# Supplementary material for: Density functional theory studies on the conversion of hydroxyheme to iron-verdoheme in the presence of dioxygen
Source: Royal Society of Chemistry journal article supplement (doi:10.1039/c6dt04250c), 2017-01-01

## Supplementary material to accompany the manuscript:

### Density functional theory studies on the conversion of hydroxyheme to iron-verdoheme in the presence of dioxygen.

| Compounds  | Stabilization Energy (kcal.mol <sup>-1</sup> ) |              |       |        |              |       |
|------------|------------------------------------------------|--------------|-------|--------|--------------|-------|
|            | B3LYP*                                         |              |       | OPBE   |              |       |
|            | Low                                            | Intermediate | High  | Low    | Intermediate | High  |
| 2,4,6(1)   | 0.00                                           | 0.32         | 7.10  | 0.00   | 0.00         | 8.90  |
| 2,4,6(TS1) | 12.15                                          | 14.77        | 29.50 | 10.35  | 10.88        | ---   |
| 2,4,6(2)   | 7.02                                           | 10.25        | 18.46 | 6.28   | 6.70         | 15.43 |
| 2,4,6(TS2) | 9.87                                           | 11.00        | 25.02 | 7.69   | 7.85         | ---   |
| 2,4,6(3)   | 3.44                                           | 2.05         | 12.38 | 3.01   | 2.22         | 9.74  |
| 2,4,6(TS3) | 10.95                                          | 10.60        | 19.00 | 9.61   | 8.92         | ---   |
| 2,4,6(4)   | -14.56                                         | -14.82       | -3.55 | -12.80 | -13.68       | -7.21 |
| 1,3,5(1)   | 1.05                                           | 0.00         | 9.07  | 0.97   | 0.00         | 8.25  |
| 1,3,5(TS1) | 24.50                                          | 22.55        | ---   | 17.94  | 16.02        | ---   |
| 1,3,5(2)   | 20.37                                          | 17.26        | 26.50 | 12.00  | 10.35        | 22.06 |
| 1,3,5(TS2) | 26.85                                          | 21.00        | ---   | 16.23  | 15.18        | ---   |
| 1,3,5(3)   | 9.84                                           | 9.14         | 15.72 | 8.22   | 7.00         | 12.45 |
| 1,3,5(TS3) | 20.03                                          | 18.95        | ---   | 14.98  | 14.35        | ---   |
| 1,3,5(4)   | 6.21                                           | 5.46         | 8.95  | 6.80   | 4.00         | 8.21  |

Table S1. Calculated relative energies for species 1-4 using the B3LYP\* and OPBE/6-311+G\*\* methods

**Table S2.** Calculated Mulliken charges and spin densities for the Fe, O1, O2 atoms and the ring macrocycle (values in parentheses are charge densities)

| <b>Compound</b>    | <b>Fe</b>   | <b>O1</b>     | <b>O2</b>     | <b>ring</b>   |
|--------------------|-------------|---------------|---------------|---------------|
| <sup>2</sup> (1)   | 1.03 (1.47) | -0.37 (-0.30) | -0.64 (-0.18) | 0.98 (-0.99)  |
| <sup>2</sup> (TS1) | 0.97 (1.46) | 0.10 (-0.34)  | 0.00 (-0.27)  | 0.08 (-0.87)  |
| <sup>2</sup> (2)   | 0.92 (1.46) | 0.14 (-0.35)  | 0.00 (-0.29)  | 0.14 (-0.84)  |
| <sup>2</sup> (TS2) | 1.30 (1.44) | 0.57 (-0.38)  | -0.63 (-0.37) | 0.13 (-0.79)  |
| <sup>2</sup> (3)   | 1.21 (1.42) | 0.84 (-0.43)  | -0.80 (-0.50) | -0.24 (-0.49) |
| <sup>2</sup> (TS3) | 1.21 (1.41) | 0.84 (-0.43)  | 0.09 (-0.52)  | -0.96 (-0.46) |
| <sup>2</sup> (4)   | 1.19 (1.39) | 0.84 (-0.43)  | ---           | -0.98 (-0.96) |
| <sup>3</sup> (1)   | 1.06 (1.45) | 0.37 (-0.31)  | 0.61 (-0.22)  | -0.04 (-1.92) |
| <sup>3</sup> (TS1) | 0.88 (1.43) | 0.23 (-0.36)  | 0.33 (-0.26)  | 0.56 (-1.81)  |
| <sup>3</sup> (2)   | 0.96 (1.43) | 0.13 (-0.36)  | 0.03 (-0.31)  | 0.88 (-1.76)  |
| <sup>3</sup> (TS2) | 1.24 (1.41) | 0.36 (-0.36)  | -0.46 (-0.33) | 0.86 (-1.72)  |
| <sup>3</sup> (3)   | 1.22 (1.35) | 0.86 (-0.41)  | 0.01 (-0.53)  | -0.09 (-1.41) |
| <sup>3</sup> (TS3) | 1.29 (1.34) | 0.79 (-0.45)  | -0.10 (-0.52) | 0.02 (-1.37)  |
| <sup>3</sup> (4)   | 1.28 (1.34) | 0.78 (-0.46)  | ---           | -0.06 (-1.28) |

**Table S3.** Calculated selected bond distances for all of the species in the doublet, quartet and sextet spin

| Compound                     | Fe-O1 | Fe-N3 | Fe-N <sub>ave.ring</sub> | O1-O2 | O2-C7 | C7-C6 | C6-C8 | C6-O5 |
|------------------------------|-------|-------|--------------------------|-------|-------|-------|-------|-------|
| <b><sup>2,4,6</sup>(1)</b>   |       |       |                          |       |       |       |       |       |
| Doublet                      | 1.86  | 2.06  | 2.02                     | 1.35  | 2.96  | 1.44  | 1.44  | 1.27  |
| Quartet                      | 1.88  | 2.07  | 2.01                     | 1.35  | 3.18  | 1.44  | 1.44  | 1.27  |
| Sextet                       | 2.36  | 2.20  | 1.99                     | 1.22  | 3.68  | 1.45  | 1.45  | 1.24  |
| <b><sup>2,4,6</sup>(TS1)</b> |       |       |                          |       |       |       |       |       |
| Doublet                      | 1.90  | 2.06  | 2.00                     | 1.48  | 1.77  | 1.52  | 1.44  | 1.25  |
| Quartet                      | 2.05  | 2.04  | 2.01                     | 1.48  | 1.65  | 1.54  | 1.44  | 1.25  |
| <b><sup>2,4,6</sup>(2)</b>   |       |       |                          |       |       |       |       |       |
| Doublet                      | 1.90  | 2.06  | 1.97                     | 1.55  | 1.50  | 1.54  | 1.45  | 1.22  |
| Quartet                      | 1.96  | 2.50  | 1.96                     | 1.44  | 1.46  | 1.55  | 1.46  | 1.22  |
| Sextet                       | 2.01  | 2.38  | 1.97                     | 1.44  | 1.47  | 1.54  | 1.46  | 1.23  |
| <b><sup>2,4,6</sup>(TS2)</b> |       |       |                          |       |       |       |       |       |
| Doublet                      | 1.66  | 2.12  | 1.96                     | 2.20  | 1.45  | 1.58  | 1.45  | 1.25  |
| Quartet                      | 1.73  | 2.41  | 1.96                     | 2.05  | 1.44  | 1.55  | 1.46  | 1.24  |
| <b><sup>2,4,6</sup>(3)</b>   |       |       |                          |       |       |       |       |       |
| Doublet                      | 1.62  | 2.22  | 1.99                     | 3.10  | 1.31  | 1.78  | 1.40  | 1.21  |
| Quartet                      | 1.62  | 2.23  | 1.98                     | 3.10  | 1.32  | 1.80  | 1.39  | 1.21  |
| Sextet                       | 1.62  | 2.21  | 2.00                     | 3.01  | 1.31  | 1.80  | 1.41  | 1.21  |
| <b><sup>2,4,6</sup>(TS3)</b> |       |       |                          |       |       |       |       |       |
| Doublet                      | 1.62  | 2.13  | 2.01                     | ---   | 1.30  | 3.02  | 1.50  | 1.21  |
| Quartet                      | 1.62  | 2.10  | 2.02                     | ---   | 1.29  | 3.03  | 1.51  | 1.21  |
| Sextet                       | 1.62  | 2.10  | 2.07                     | ---   | 1.30  | 3.15  | 1.50  | 1.21  |
| <b><sup>2,4,6</sup>(4)</b>   |       |       |                          |       |       |       |       |       |
| Doublet                      | 1.62  | 2.20  | 2.00                     | ---   | ---   | ---   | ---   | 1.14  |
| Quartet                      | 1.62  | 2.20  | 2.00                     | ---   | ---   | ---   | ---   | 1.14  |
| Sextet                       | 1.61  | 2.24  | 2.05                     | ---   | ---   | ---   | ---   | 1.14  |

stat  
es  
usin  
g  
B3  
LY  
P\*/  
6-  
31+  
G\*  
met  
hod.

**Table S4.** Calculated relative energies in the solvent

| Relative Energies (kcal.mol <sup>-1</sup> ) |
|---------------------------------------------|
|---------------------------------------------|

| Compounds          | $\Delta(E_{\text{gas}})$ |              | $\Delta(E+\text{protein})$ |              | $\Delta(E+\text{ethanol})$ |              |
|--------------------|--------------------------|--------------|----------------------------|--------------|----------------------------|--------------|
|                    | Low                      | Intermediate | Low                        | Intermediate | Low                        | Intermediate |
| <sup>2,4</sup> (1) | 0.00                     | 0.32         | -1.14                      | -1.08        | -2.20                      | -2.34        |
| <sup>2,4</sup> TS1 | 12.15                    | 14.77        | 9.36                       | 11.08        | 5.05                       | 7.24         |

**Table S5.** Calculated energies for all of the species using the CASSCF(7e, 7o) level and the MP2 corrected energies.

| Compounds | Total energy (a.u.) |            |
|-----------|---------------------|------------|
|           | CASSCF              | CASSCF/MP2 |
|           |                     |            |

|            | Low        | Intermediate | High      | Low        | Intermediate | High       |
|------------|------------|--------------|-----------|------------|--------------|------------|
| 2,4,6(1)   | -2694.7862 | -2694.7180   | ---       | -2695.8351 | -2695.7993   | ---        |
| 2,4,6(TS1) | -2694.5314 | -2694.5280   | ---       | -2695.6852 | -2695.6530   | ---        |
| 2,4,6(2)   | -2694.6608 | -2694.6145   | ---       | -2695.7553 | -2695.7367   | ---        |
| 2,4,6(TS2) | -2694.5795 | ---          | ---       | -2695.7125 | ---          | ---        |
| 2,4,6(3)   | -2694.7235 | -2694.6994   | -         | -2695.8110 | -2695.7984   | -2695.6813 |
| 2,4,6(TS3) | -2694.5826 | -2694.5411   | 2694.5108 | -2695.7068 | -2695.7189   | ---        |
| 2,4,6(4)   | -2695.1475 | -2695.1475   | ---       | -2696.3861 | -2696.3414   | -2696.1595 |
|            |            |              | 2694.9067 |            |              |            |
| 1,3,5(1)   | -2696.4989 | -2696.4552   | -         | -2697.5714 | -2697.5825   | -2697.3861 |
|            |            |              | 2696.3395 |            |              |            |
| 1,3,5(TS1) | -2695.6218 | -2695.7164   | ---       | -2697.3249 | -2697.3401   | ---        |
| 1,3,5(2)   | -2695.7809 | -2695.8429   | ---       | -2697.3526 | -2697.3890   | -2697.2739 |
| 1,3,5(TS2) | -2695.5740 | -2695.5843   | ---       | -2697.3335 | -2697.3398   | ---        |
| 1,3,5(3)   | -2696.3166 | -2696.3082   | -         | -2697.4987 | -2697.5068   | -2697.3584 |
|            |            |              | 2696.1835 |            |              |            |
| 1,3,5(TS3) | -2695.5879 | -2695.5822   | ---       | -2697.3702 | -2697.3764   | ---        |
| 1,3,5(4)   | -2696.3942 | -2696.4244   | -         | -2697.4930 | -2697.5012   | -2697.4198 |
|            |            |              | 2696.3877 |            |              |            |

**Table S6.** Calculated Mullikan spin densities for the iron atom and the ring macrocycle using the CASSCF(7e, 7o) level.

| <b>Compounds</b>   | <b>Fe</b> | <b>Ring</b> |
|--------------------|-----------|-------------|
| <sup>2</sup> (1)   | 0.055     | 0.963       |
| <sup>2</sup> (TS1) | 1.163     | -0.125      |
| <sup>2</sup> (2)   | 1.068     | -0.077      |
| <sup>2</sup> (TS2) | 0.972     | 0.008       |
| <sup>2</sup> (3)   | 0.964     | 0.012       |
| <sup>2</sup> (TS3) | 0.885     | 0.157       |
| <sup>2</sup> (4)   | 0.860     | 0.149       |

**Table S7.** Calculated selected bond distances for all of the species in the singlet, triplet and quintet spin states using B3LYP\*/6-31+G\* method.

| Compound             | Fe-O1 | Fe-N3 | Fe-N <sub>ave.ring</sub> | O1-O2 | O2-C7 | C7-C6 | C6-C8 | C6-O5 |
|----------------------|-------|-------|--------------------------|-------|-------|-------|-------|-------|
| <sup>1,3,5</sup> (1) |       |       |                          |       |       |       |       |       |
| Singlet              | 1.89  | 2.08  | 2.01                     | 1.36  | 3.34  | 1.45  | 1.45  | 1.25  |
| Triplet              | 1.89  | 2.09  | 2.02                     | 1.36  | 3.34  | 1.45  | 1.45  | 1.25  |
| Quintet              | 2.48  | 2.17  | 1.99                     | 1.25  | 3.59  | 1.45  | 1.45  | 1.24  |
| <sup>1,3</sup> (TS1) |       |       |                          |       |       |       |       |       |
| Singlet              | 1.93  | 2.07  | 2.00                     | 1.50  | 1.62  | 1.52  | 1.44  | 1.24  |
| Triplet              | 2.05  | 2.04  | 2.01                     | 1.48  | 1.65  | 1.54  | 1.44  | 1.25  |
| <sup>1,3,5</sup> (2) |       |       |                          |       |       |       |       |       |
| Singlet              | 1.93  | 2.07  | 1.99                     | 1.57  | 1.50  | 1.53  | 1.44  | 1.24  |
| Triplet              | 2.07  | 2.45  | 2.00                     | 1.48  | 1.49  | 1.55  | 1.44  | 1.25  |
| <sup>1,3</sup> (TS2) |       |       |                          |       |       |       |       |       |
| Singlet              | 1.70  | 2.08  | 2.00                     | 1.96  | 1.47  | 1.58  | 1.45  | 1.24  |
| Triplet              | 1.70  | 2.41  | 1.98                     | 1.97  | 1.47  | 1.59  | 1.45  | 1.24  |
| <sup>1,3,5</sup> (3) |       |       |                          |       |       |       |       |       |
| Singlet              | 1.64  | 2.26  | 2.01                     | 3.02  | 1.32  | 1.68  | 1.47  | 1.23  |
| Triplet              | 1.64  | 2.26  | 2.00                     | 3.03  | 1.32  | 1.70  | 1.47  | 1.23  |
| Quintet              | 1.64  | 2.21  | 2.00                     | 3.41  | 1.31  | 1.72  | 1.45  | 1.23  |
| <sup>1,3</sup> (TS3) |       |       |                          |       |       |       |       |       |
| Singlet              | 1.62  | 2.13  | 2.01                     | ---   | 1.30  | 3.02  | 1.50  | 1.21  |
| Triplet              | 1.62  | 2.10  | 2.02                     | ---   | 1.29  | 3.03  | 1.51  | 1.21  |
| <sup>1,3,5</sup> (4) |       |       |                          |       |       |       |       |       |
| Singlet              | 1.64  | 2.17  | 2.00                     | ---   | ---   | ---   | ---   | 1.16  |
| Triplet              | 1.64  | 2.17  | 2.00                     | ---   | ---   | ---   | ---   | 1.16  |
| Quintet              | 1.63  | 2.30  | 2.08                     | ---   | ---   | ---   | ---   | 1.15  |

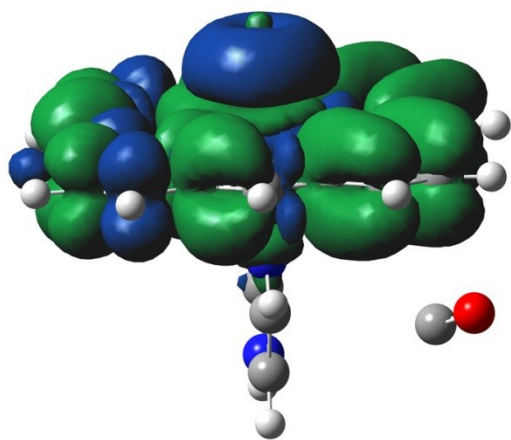

doublet spin state

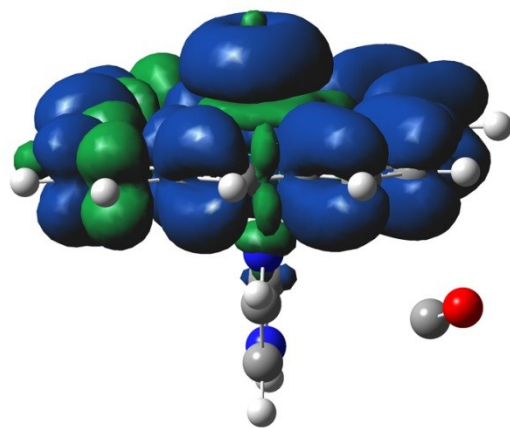

quartet spin state

**Figure S1.** <sup>2,4</sup>: spin-density plot (majority spin in blue; minority spin in green)



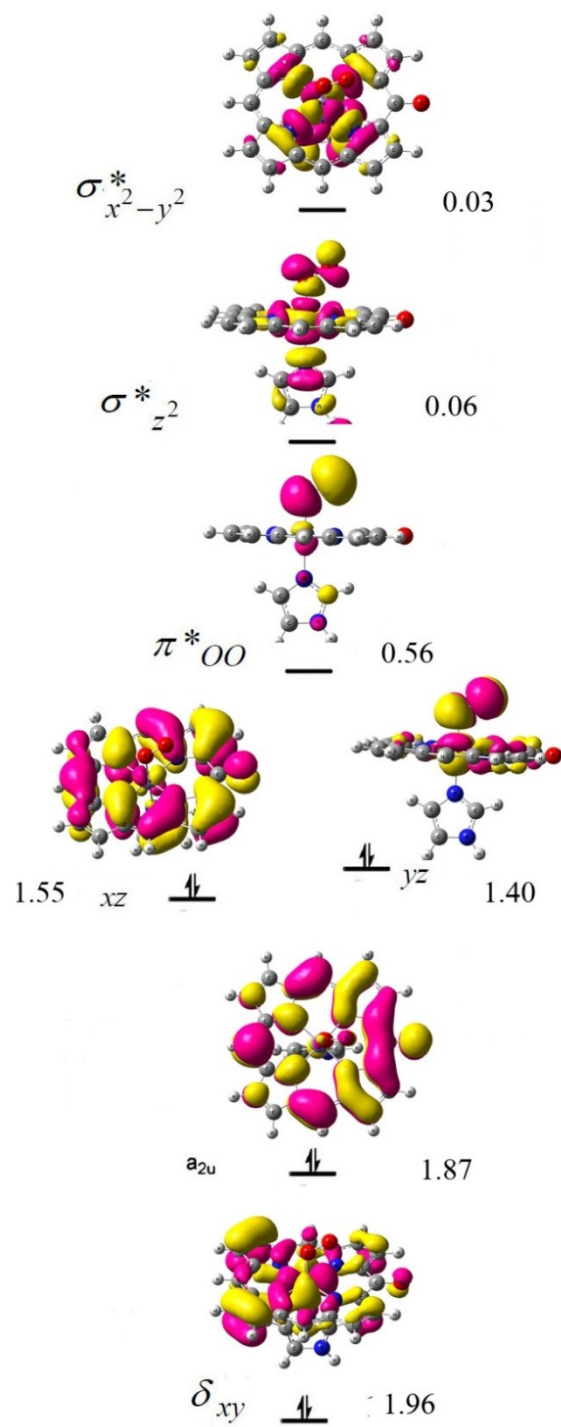

**Figure S2.** Natural orbitals and occupation numbers for CAS(7e, 7o) calculations of the singlet state configuration of complexes 1.

**Tables include the species optimized xyz Cartesian coordinates data in different spin states.  
For each table, the corresponding figure is accompanied.**

|    |             |             |             |
|----|-------------|-------------|-------------|
| Fe | 0.13721600  | 0.00000600  | -0.39454600 |
| N  | -1.28744600 | -1.41097700 | -0.27479500 |
| N  | 1.60411800  | -1.41428300 | -0.39593300 |
| N  | -1.28743300 | 1.41099700  | -0.27479700 |
| N  | 1.60412700  | 1.41427900  | -0.39593700 |
| C  | -2.65069500 | -1.25125700 | -0.25297100 |
| C  | 2.95760500  | -1.23148200 | -0.48223300 |
| C  | -1.07537000 | -2.77476100 | -0.24359400 |
| C  | 1.40237300  | -2.78336300 | -0.35670300 |
| C  | -2.65068300 | 1.25128700  | -0.25295300 |
| C  | 2.95761400  | 1.23146700  | -0.48223400 |
| C  | -1.07534800 | 2.77478000  | -0.24357700 |
| C  | 1.40239500  | 2.78336000  | -0.35670000 |
| C  | -3.30786100 | -2.50767300 | -0.19889400 |
| C  | 3.63375000  | -2.51075200 | -0.49739200 |
| C  | -2.32151500 | -3.46697100 | -0.19109800 |
| C  | 2.66969100  | -3.46884300 | -0.41666600 |
| C  | -3.30783900 | 2.50770700  | -0.19884000 |
| C  | 3.63376800  | 2.51073100  | -0.49740100 |
| C  | -2.32148600 | 3.46699800  | -0.19105700 |
| C  | 2.66971900  | 3.46882900  | -0.41664400 |
| H  | -4.38243600 | -2.62056900 | -0.17415000 |
| H  | 4.70855400  | -2.63657900 | -0.56189700 |
| H  | -2.42818300 | -4.54580800 | -0.16468200 |
| H  | 2.78747600  | -4.54650900 | -0.40372700 |
| H  | -4.38241300 | 2.62061000  | -0.17407500 |
| H  | 4.70857300  | 2.63654900  | -0.56191500 |
| H  | -2.42814600 | 4.54583500  | -0.16462800 |
| H  | 2.78751500  | 4.54649400  | -0.40368900 |
| C  | 3.60860600  | -0.00001000 | -0.52229200 |
| C  | 0.17671500  | 3.40628200  | -0.27705800 |
| C  | 0.17668700  | -3.40627400 | -0.27706800 |
| H  | 4.69269400  | -0.00001400 | -0.59146100 |
| H  | 0.17300000  | 4.49356400  | -0.25266600 |
| H  | 0.17296200  | -4.49355600 | -0.25268600 |
| H  | 2.35686100  | 0.00008000  | 2.03345400  |
| C  | 1.37186300  | 0.00003200  | 2.47357700  |
| C  | 1.00499700  | -0.00004500 | 3.79134600  |
| C  | -0.79416400 | -0.00004300 | 2.49628400  |
| N  | -0.38019500 | -0.00005500 | 3.78858900  |
| H  | 1.57833300  | -0.00006900 | 4.70534800  |
| H  | -1.82913900 | -0.00006300 | 2.19065800  |
| H  | -0.98438400 | -0.00008600 | 4.59602800  |
| N  | 0.24302400  | 0.00000500  | 1.68103800  |
| C  | -3.38711800 | 0.00001800  | -0.25187100 |
| O  | -4.63856200 | 0.00002400  | -0.21660900 |
| O  | 0.15179400  | -0.00000800 | -2.12775600 |
| O  | -0.91504200 | -0.00000400 | -2.82846200 |

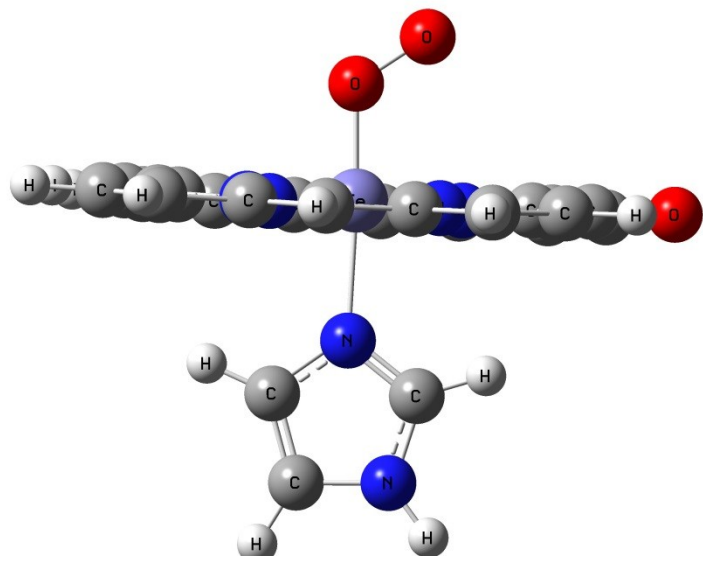

|    |             |             |             |
|----|-------------|-------------|-------------|
| Fe | 0.16658600  | 0.00000100  | -0.36638500 |
| N  | -1.26060600 | -1.42835100 | -0.26618000 |
| N  | 1.59806700  | -1.41673600 | -0.39890700 |
| N  | -1.26042300 | 1.42852600  | -0.26611600 |
| N  | 1.59825000  | 1.41656500  | -0.39885600 |
| C  | -2.62002600 | -1.25616900 | -0.24639700 |
| C  | 2.95347300  | -1.23066500 | -0.49240100 |
| C  | -1.06238200 | -2.79261200 | -0.24134900 |
| C  | 1.40569800  | -2.79263300 | -0.36984200 |
| C  | -2.61986100 | 1.25651500  | -0.24634300 |
| C  | 2.95363200  | 1.23032900  | -0.49237300 |
| C  | -1.06202600 | 2.79276100  | -0.24123900 |
| C  | 1.40605300  | 2.79248500  | -0.36975500 |
| C  | -3.28962100 | -2.50618300 | -0.19557300 |
| C  | 3.63362000  | -2.50588600 | -0.52083900 |
| C  | -2.31183900 | -3.47507300 | -0.19184200 |
| C  | 2.67458000  | -3.46895300 | -0.44256700 |
| C  | -3.28930100 | 2.50661200  | -0.19547900 |
| C  | 3.63393700  | 2.50546600  | -0.52078400 |
| C  | -2.31139800 | 3.47537800  | -0.19171000 |
| C  | 2.67501600  | 3.46864900  | -0.44247600 |
| H  | -4.36511400 | -2.60932100 | -0.17235400 |
| H  | 4.70838900  | -2.62571900 | -0.59509900 |
| H  | -2.42791500 | -4.55298000 | -0.17054600 |
| H  | 2.79703000  | -4.54610500 | -0.43921400 |
| H  | -4.36478000 | 2.60988400  | -0.17225800 |
| H  | 4.70872000  | 2.62516700  | -0.59505300 |
| H  | -2.42733700 | 4.55329900  | -0.17037700 |
| H  | 2.79760000  | 4.54578700  | -0.43909700 |
| C  | 3.60329500  | -0.00021100 | -0.53199100 |
| C  | 0.18848000  | 3.42480400  | -0.28414900 |
| C  | 0.18805000  | -3.42480700 | -0.28426700 |
| H  | 4.68685600  | -0.00028100 | -0.60752100 |
| H  | 0.19012000  | 4.51210600  | -0.26692600 |
| H  | 0.18955700  | -4.51211000 | -0.26707600 |
| H  | 2.34381400  | 0.00056800  | 2.07465200  |
| C  | 1.35812900  | 0.00024800  | 2.51360100  |
| C  | 0.98859800  | 0.00008700  | 3.83106200  |
| C  | -0.80837700 | -0.00043100 | 2.53266300  |
| N  | -0.39561000 | -0.00038100 | 3.82638000  |
| H  | 1.56108500  | 0.00023100  | 4.74558500  |
| H  | -1.84278800 | -0.00074900 | 2.22511300  |
| H  | -1.00080100 | -0.00061500 | 4.63314600  |
| N  | 0.23035500  | -0.00006100 | 1.72022600  |
| C  | -3.35129100 | 0.00022100  | -0.24726200 |
| O  | -4.60149500 | 0.00030100  | -0.21252200 |
| O  | 0.04735600  | 0.00005400  | -2.23584200 |
| O  | -1.08018000 | 0.00017900  | -2.86975200 |

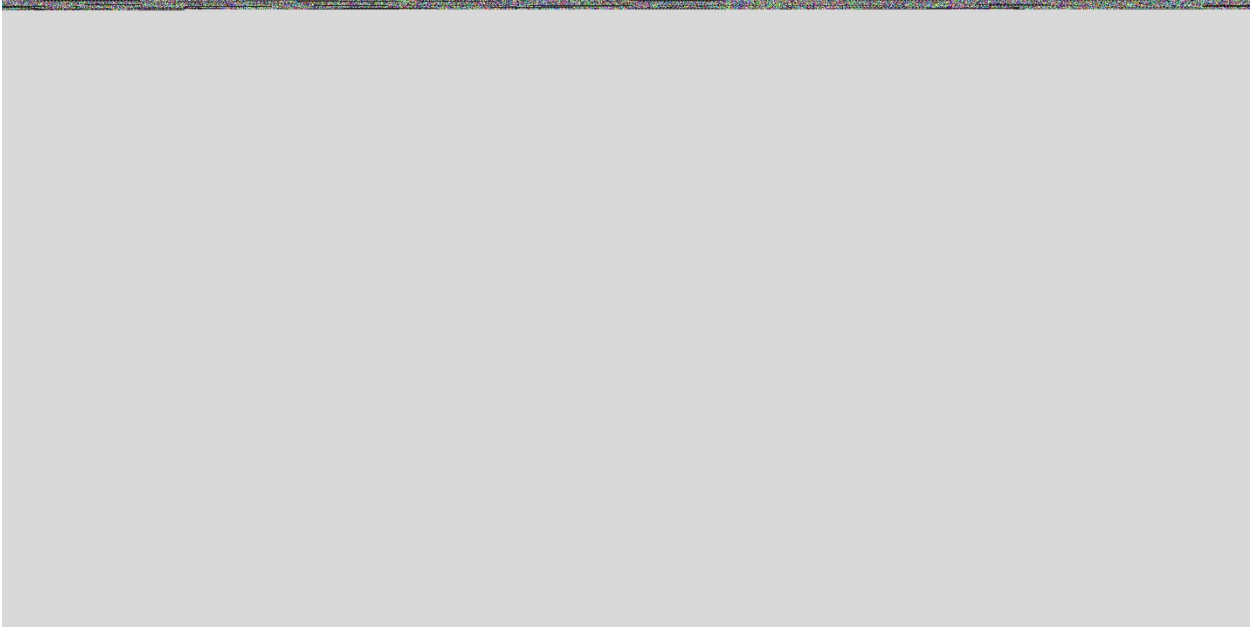

|    |             |             |             |
|----|-------------|-------------|-------------|
| Fe | 0.13941200  | 0.00000200  | -0.34417000 |
| N  | -1.28709700 | -1.41259000 | -0.23134600 |
| N  | 1.58580300  | -1.41298800 | -0.40924800 |
| N  | -1.28712300 | 1.41256600  | -0.23133900 |
| N  | 1.58577600  | 1.41302000  | -0.40924600 |
| C  | -2.63266300 | -1.26284600 | -0.28660600 |
| C  | 2.93274200  | -1.23595300 | -0.60918100 |
| C  | -1.07376000 | -2.78070900 | -0.14459400 |
| C  | 1.40031500  | -2.76807000 | -0.31001600 |
| C  | -2.63268600 | 1.26279700  | -0.28660100 |
| C  | 2.93271800  | 1.23601100  | -0.60918100 |
| C  | -1.07381200 | 2.78068900  | -0.14458400 |
| C  | 1.40026300  | 2.76809700  | -0.31001100 |
| C  | -3.30745200 | -2.52025000 | -0.22039400 |
| C  | 3.61002100  | -2.50616600 | -0.63459100 |
| C  | -2.33081500 | -3.47300000 | -0.12075900 |
| C  | 2.65568000  | -3.46003900 | -0.43719000 |
| C  | -3.30749900 | 2.52018900  | -0.22038900 |
| C  | 3.60997400  | 2.50623600  | -0.63458700 |
| C  | -2.33088000 | 3.47295600  | -0.12074500 |
| C  | 2.65561400  | 3.46009100  | -0.43718800 |
| H  | -4.38120000 | -2.63302500 | -0.24909000 |
| H  | 4.67471400  | -2.63642300 | -0.78111600 |
| H  | -2.44210000 | -4.54845600 | -0.05982800 |
| H  | 2.77583200  | -4.53524000 | -0.39507100 |
| H  | -4.38125000 | 2.63294400  | -0.24908800 |
| H  | 4.67466500  | 2.63651400  | -0.78111000 |
| H  | -2.44218600 | 4.54841000  | -0.05981000 |
| H  | 2.77574600  | 4.53529400  | -0.39506800 |
| C  | 3.56497400  | 0.00003500  | -0.72178000 |
| C  | 0.16625600  | 3.39843800  | -0.15908600 |
| C  | 0.16632000  | -3.39843400 | -0.15909500 |
| H  | 4.63906100  | 0.00004500  | -0.88122200 |
| H  | 0.17473900  | 4.48306200  | -0.09620600 |
| H  | 0.17482400  | -4.48305800 | -0.09621700 |
| H  | 2.39789800  | 0.00008600  | 2.05457600  |
| C  | 1.42056700  | 0.00005000  | 2.51004200  |
| C  | 1.08312600  | -0.00019500 | 3.83471000  |
| C  | -0.74545700 | -0.00001600 | 2.58525900  |
| N  | -0.29937900 | 0.00013500  | 3.86307300  |
| H  | 1.67766500  | -0.00034300 | 4.73470400  |
| H  | -1.78900100 | -0.00000600 | 2.31216800  |
| H  | -0.88180300 | 0.00024500  | 4.68802900  |
| N  | 0.27307300  | -0.00000100 | 1.74222500  |
| C  | -3.35622400 | -0.00003100 | -0.35575700 |
| O  | -4.59783800 | -0.00004300 | -0.41870300 |
| O  | 0.11426900  | 0.00000500  | -2.18787300 |
| O  | -1.03063300 | -0.00000700 | -2.78243800 |

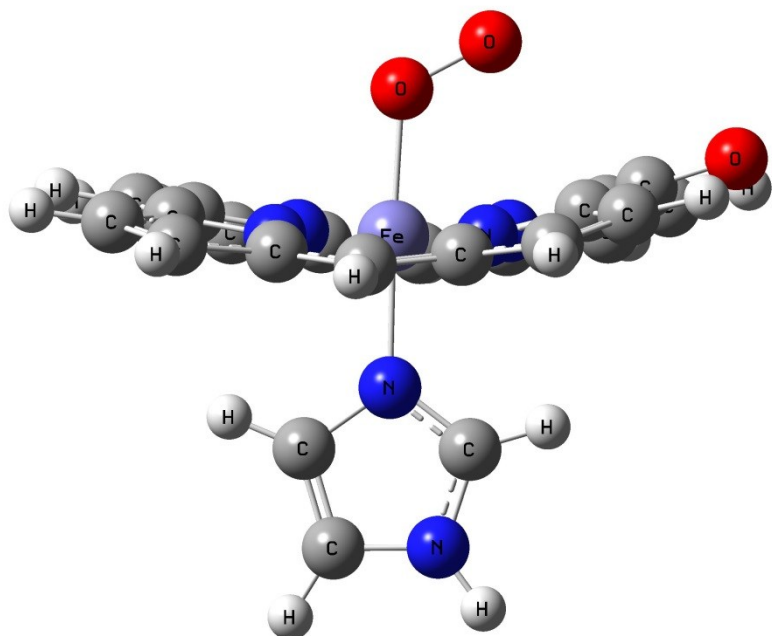



|    |             |             |             |
|----|-------------|-------------|-------------|
| Fe | 0.13401600  | 0.01749200  | -0.31533000 |
| N  | -1.32204700 | -1.37612200 | -0.22887300 |
| N  | 1.56580600  | -1.39228300 | -0.25451600 |
| N  | -1.29931800 | 1.44380600  | -0.38053800 |
| N  | 1.58398600  | 1.42609400  | -0.41161300 |
| C  | -2.66840800 | -1.22023600 | -0.27907400 |
| C  | 2.92762500  | -1.22883700 | -0.34383800 |
| C  | -1.11872800 | -2.74521800 | -0.13915600 |
| C  | 1.36207700  | -2.74490500 | -0.17145200 |
| C  | -2.64936200 | 1.30035100  | -0.41379500 |
| C  | 2.94268200  | 1.23790200  | -0.48484500 |
| C  | -1.08075000 | 2.81353400  | -0.41733000 |
| C  | 1.39918600  | 2.78503500  | -0.45381000 |
| C  | -3.34992100 | -2.47480300 | -0.21118300 |
| C  | 3.59380900  | -2.50446700 | -0.30011700 |
| C  | -2.37806500 | -3.43240100 | -0.11992000 |
| C  | 2.61746500  | -3.44876800 | -0.18853000 |
| C  | -3.31580700 | 2.56195300  | -0.46532300 |
| C  | 3.62628900  | 2.50150400  | -0.56884700 |
| C  | -2.33235900 | 3.51302300  | -0.46476900 |
| C  | 2.66294100  | 3.46648200  | -0.54524300 |
| H  | -4.42433100 | -2.58173400 | -0.23883700 |
| H  | 4.66596600  | -2.64383600 | -0.35514200 |
| H  | -2.49391300 | -4.50727900 | -0.05838900 |
| H  | 2.72277600  | -4.52496000 | -0.13483900 |
| H  | -4.38894200 | 2.67832600  | -0.50050200 |
| H  | 4.70006900  | 2.62042100  | -0.63875600 |
| H  | -2.43622400 | 4.59022900  | -0.50459000 |
| H  | 2.78352800  | 4.54126900  | -0.59566800 |
| C  | 3.57611300  | -0.00260400 | -0.45449600 |
| C  | 0.16213500  | 3.42581900  | -0.43978300 |
| C  | 0.11773900  | -3.36784900 | -0.10435300 |
| H  | 4.65987200  | -0.01339900 | -0.52185900 |
| H  | 0.17273300  | 4.51165800  | -0.47595400 |
| H  | 0.11769200  | -4.45263300 | -0.04330800 |
| H  | 2.25972300  | 0.25056000  | 2.15285700  |
| C  | 1.26089800  | 0.22105900  | 2.55741600  |
| C  | 0.85331900  | 0.28459800  | 3.86030300  |
| C  | -0.90371400 | 0.09374100  | 2.52549800  |
| N  | -0.52619200 | 0.20226300  | 3.82021900  |
| H  | 1.39861100  | 0.37765700  | 4.78622200  |
| H  | -1.92923500 | 0.00928200  | 2.20266500  |
| H  | -1.15133400 | 0.21988300  | 4.61302400  |
| N  | 0.15714400  | 0.10255400  | 1.73515600  |
| C  | -3.38452400 | 0.04325900  | -0.37387300 |
| O  | -4.62909900 | 0.05319900  | -0.39391600 |
| O  | 0.11643400  | -0.16069100 | -2.18699700 |
| O  | 0.16505100  | -1.24793900 | -2.85259600 |

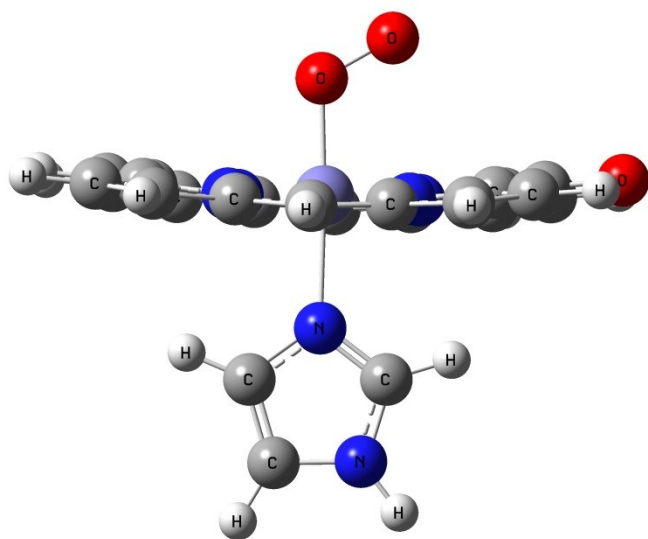

|    |             |             |             |
|----|-------------|-------------|-------------|
| Fe | -0.13623500 | -0.06041800 | -0.14023200 |
| N  | 1.24222500  | 1.38147300  | -0.19524800 |
| N  | -1.57337400 | 1.30728300  | -0.04382100 |
| N  | 1.27968000  | -1.37355400 | -0.65492700 |
| N  | -1.53462100 | -1.43859200 | -0.45791700 |
| C  | 2.61523800  | 1.23583200  | -0.14577800 |
| C  | -2.92649900 | 1.08912400  | 0.13625000  |
| C  | 1.02773300  | 2.75183600  | -0.16531400 |
| C  | -1.42164000 | 2.69477300  | -0.02290100 |
| C  | 2.64618700  | -1.21667800 | -0.55978300 |
| C  | -2.89317900 | -1.32168400 | -0.23117100 |
| C  | 1.10031900  | -2.69142600 | -1.05283800 |
| C  | -1.34473200 | -2.76255300 | -0.86182200 |
| C  | 3.25734500  | 2.48884900  | -0.09072700 |
| C  | -3.62342300 | 2.33914500  | 0.28248000  |
| C  | 2.26234900  | 3.44489400  | -0.12121200 |
| C  | -2.69713100 | 3.32788400  | 0.16130500  |
| C  | 3.32275000  | -2.40402900 | -0.90606100 |
| C  | -3.55343100 | -2.57578400 | -0.46879300 |
| C  | 2.35373400  | -3.32840800 | -1.23433700 |
| C  | -2.59888500 | -3.45689700 | -0.87802500 |
| H  | 4.32997500  | 2.61258700  | -0.05524300 |
| H  | -4.69201200 | 2.42842700  | 0.43129000  |
| H  | 2.36441400  | 4.52288200  | -0.10370600 |
| H  | -2.84601200 | 4.39977500  | 0.20076500  |
| H  | 4.39842000  | -2.50293600 | -0.90843700 |
| H  | -4.61859000 | -2.73582700 | -0.36010600 |
| H  | 2.48304400  | -4.35527300 | -1.55303600 |
| H  | -2.71859100 | -4.49417700 | -1.16511300 |
| C  | -3.54915700 | -0.14756700 | 0.10926300  |
| C  | -0.13452500 | -3.33227600 | -1.16586600 |
| C  | -0.22790700 | 3.36369500  | -0.11056200 |
| H  | -4.62298400 | -0.18497400 | 0.25856200  |
| H  | -0.12878300 | -4.37316500 | -1.47478900 |
| H  | -0.25236200 | 4.44883700  | -0.08607800 |
| H  | -1.94621100 | -1.09915200 | 2.50076500  |
| C  | -0.96030300 | -0.84591200 | 2.85936500  |
| C  | -0.45404300 | -0.91141200 | 4.12784900  |
| C  | 1.09264600  | -0.15171700 | 2.73498000  |
| N  | 0.85117000  | -0.46668100 | 4.02854500  |
| H  | -0.88596400 | -1.22375900 | 5.06561500  |
| H  | 2.03605900  | 0.22702500  | 2.37022800  |
| H  | 1.51786000  | -0.39193400 | 4.78366800  |
| N  | 0.01313100  | -0.37150000 | 2.00210200  |
| C  | 3.36099300  | -0.00745300 | -0.19773800 |
| O  | 4.58782000  | -0.02566500 | 0.00638200  |
| O  | -0.49143400 | 1.01098900  | -3.20622100 |
| O  | -0.69016900 | 2.20594200  | -3.32527200 |

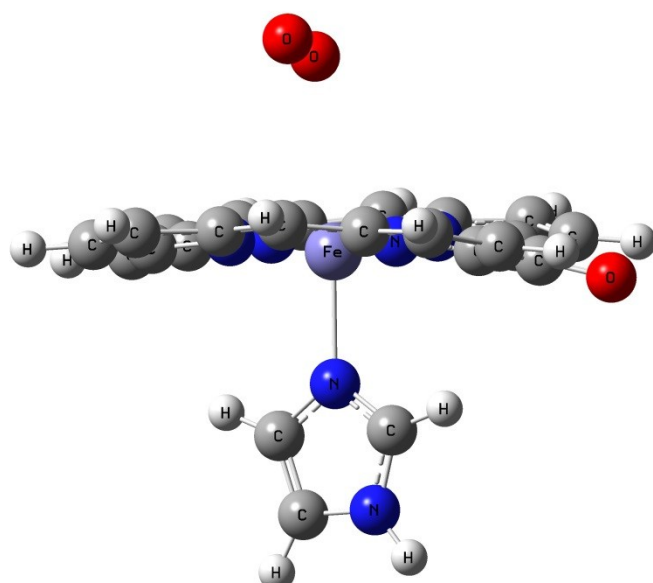

|    |             |             |             |
|----|-------------|-------------|-------------|
| O  | 1.95524100  | 0.67514400  | -2.04538200 |
| O  | 0.49813500  | 0.43779600  | -2.05765400 |
| N  | -0.55641000 | -0.26943700 | 1.65542000  |
| C  | -1.76994400 | -0.33755900 | 2.16844800  |
| C  | 0.32439900  | -0.41944200 | 2.70620600  |
| C  | -0.37193300 | -0.58024300 | 3.87273000  |
| N  | -1.70826700 | -0.52609300 | 3.51467500  |
| H  | -2.68945500 | -0.25438900 | 1.60931800  |
| H  | 1.38978200  | -0.40889700 | 2.53588000  |
| H  | -0.05518700 | -0.72482300 | 4.89404800  |
| H  | -2.50004400 | -0.60795800 | 4.13326800  |
| C  | 2.41586600  | 1.12795600  | -0.72488300 |
| N  | 1.21848500  | 1.37598900  | 0.05793100  |
| C  | 3.10583000  | 2.46111700  | -0.82737600 |
| C  | 2.63662200  | -1.24034300 | 0.08905700  |
| Fe | -0.07449600 | 0.02301200  | -0.31976200 |
| C  | 1.09016500  | 2.70009700  | 0.19265900  |
| C  | 2.31953900  | 3.37955100  | -0.24350200 |
| H  | 4.07124600  | 2.59614200  | -1.29598300 |
| N  | 1.30427300  | -1.41045900 | -0.15600500 |
| N  | -1.44403500 | -1.31725400 | -0.82744400 |
| C  | 3.27488600  | -2.48364000 | 0.34904400  |
| N  | -1.49847500 | 1.46624000  | -0.31297900 |
| C  | -0.12541500 | 3.35184800  | 0.45156100  |
| H  | 2.47508000  | 4.45226100  | -0.18305100 |
| C  | -1.27524800 | -2.69882100 | -0.86395000 |
| C  | 1.08884200  | -2.76847800 | -0.11216600 |
| C  | 2.30075900  | -3.45143200 | 0.21973300  |
| C  | -2.74988700 | -1.09251700 | -1.16780500 |
| H  | 4.33147700  | -2.60239800 | 0.54984400  |
| C  | -2.82027900 | 1.32787400  | -0.65494400 |
| C  | -1.34384000 | 2.75179700  | 0.13962100  |
| H  | -0.11620000 | 4.41398500  | 0.68005900  |
| C  | -0.12890300 | -3.36387300 | -0.48139100 |
| C  | -2.50026200 | -3.33434300 | -1.28348600 |
| C  | -3.41176700 | -2.34084600 | -1.48039000 |
| H  | 2.40631900  | -4.52695700 | 0.30901200  |
| C  | -3.40029500 | 0.15047500  | -1.10454800 |
| C  | -3.52883800 | 2.56934100  | -0.40721300 |
| C  | -2.62086500 | 3.44455400  | 0.10401300  |
| H  | -0.15897900 | -4.45165500 | -0.49947700 |
| H  | -2.63200500 | -4.40403100 | -1.40093500 |
| H  | -4.44630500 | -2.42808200 | -1.79340900 |
| H  | -4.45524900 | 0.17340000  | -1.36701500 |
| H  | -4.58226100 | 2.73170900  | -0.60776400 |
| H  | -2.77351400 | 4.47425300  | 0.40708700  |
| O  | 4.49908000  | 0.21794100  | 0.09224300  |
| C  | 3.29782500  | 0.02845600  | -0.12340100 |

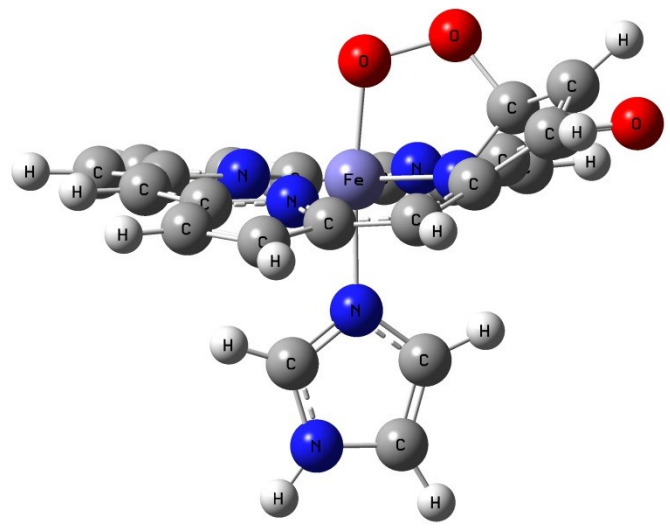

|    |             |             |             |
|----|-------------|-------------|-------------|
| O  | 1.97801600  | 0.65293000  | -2.04631300 |
| O  | 0.54261500  | 0.29229300  | -1.99776200 |
| N  | -0.60174000 | -0.27253500 | 1.64286700  |
| C  | -1.82355400 | -0.39330700 | 2.12186200  |
| C  | 0.26200700  | -0.37722400 | 2.71088300  |
| C  | -0.45601800 | -0.56514200 | 3.85957700  |
| N  | -1.78525600 | -0.57191900 | 3.46714400  |
| H  | -2.72936000 | -0.34926100 | 1.53663200  |
| H  | 1.32810200  | -0.31324800 | 2.55986700  |
| H  | -0.16005000 | -0.69307200 | 4.88913700  |
| H  | -2.58775900 | -0.68959400 | 4.06621800  |
| C  | 2.48880600  | 0.98938800  | -0.71275600 |
| N  | 1.34479300  | 1.28580500  | 0.11755300  |
| C  | 3.27501600  | 2.27628100  | -0.77094700 |
| C  | 2.55932000  | -1.40658000 | 0.05077900  |
| Fe | -0.06519200 | 0.05362600  | -0.32835600 |
| C  | 1.28753800  | 2.62687600  | 0.27964200  |
| C  | 2.56797500  | 3.22173400  | -0.13221200 |
| H  | 4.24175900  | 2.36049500  | -1.24831700 |
| N  | 1.19983100  | -1.48426200 | -0.11880700 |
| N  | -1.54906700 | -1.21022600 | -0.84691900 |
| C  | 3.10544200  | -2.69376700 | 0.27994400  |
| N  | -1.37227000 | 1.57168800  | -0.29691800 |
| C  | 0.13013300  | 3.34597500  | 0.53565700  |
| H  | 2.81389600  | 4.27296900  | -0.01865200 |
| C  | -1.48661100 | -2.58828200 | -0.83085600 |
| C  | 0.87695500  | -2.81693200 | -0.07198200 |
| C  | 2.05013900  | -3.58371100 | 0.20674800  |
| C  | -2.82273700 | -0.87937100 | -1.23958300 |
| H  | 4.15813600  | -2.89625200 | 0.42622000  |
| C  | -2.70228600 | 1.53581600  | -0.69073500 |
| C  | -1.13849500 | 2.83220600  | 0.19112300  |
| H  | 0.20413900  | 4.40753200  | 0.75434400  |
| C  | -0.39221200 | -3.33365100 | -0.40352900 |
| C  | -2.74564100 | -3.13393000 | -1.27046500 |
| C  | -3.56956200 | -2.07449300 | -1.53732300 |
| H  | 2.07999900  | -4.66471300 | 0.28848700  |
| C  | -3.35768600 | 0.41270200  | -1.18632500 |
| C  | -3.31181700 | 2.80923900  | -0.43423900 |
| C  | -2.35097300 | 3.60588400  | 0.13458400  |
| H  | -0.50078900 | -4.41571100 | -0.39556100 |
| H  | -2.96352500 | -4.19250100 | -1.35754800 |
| H  | -4.59781100 | -2.09269800 | -1.88119300 |
| H  | -4.39690500 | 0.53391600  | -1.48322900 |
| H  | -4.34492400 | 3.05522600  | -0.65360600 |
| H  | -2.43866000 | 4.63781900  | 0.45510300  |
| O  | 4.53185600  | -0.10523400 | -0.02991600 |
| C  | 3.30673300  | -0.19386800 | -0.18370700 |

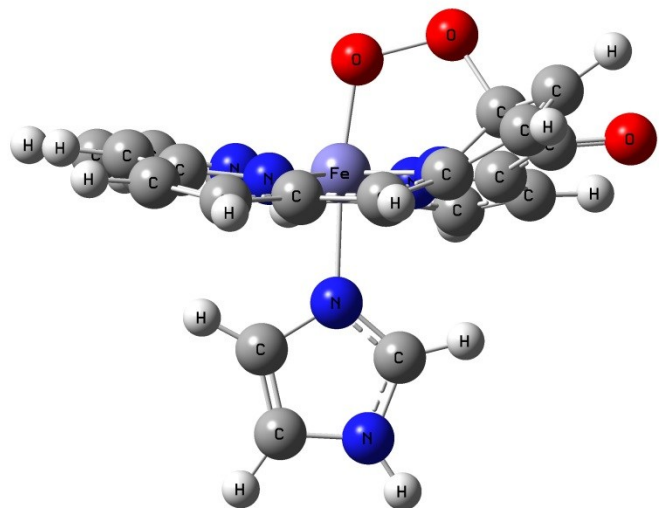



|    |             |             |             |
|----|-------------|-------------|-------------|
| O  | -2.16138800 | -0.83907300 | -2.13521400 |
| O  | -0.82818100 | -0.27326300 | -2.28039000 |
| N  | 0.63944200  | 0.29969100  | 2.02134900  |
| C  | 1.51698600  | -0.41910400 | 2.68574700  |
| C  | 0.01873800  | 1.10266100  | 2.95286800  |
| C  | 0.53316400  | 0.86372200  | 4.20094800  |
| N  | 1.49526000  | -0.11470600 | 4.01630400  |
| H  | 2.17069200  | -1.16510400 | 2.25634400  |
| H  | -0.75578800 | 1.79532700  | 2.65598300  |
| H  | 0.31649400  | 1.27819800  | 5.17413900  |
| H  | 2.06562300  | -0.53750900 | 4.73294000  |
| C  | -2.42566300 | -1.20718600 | -0.74163900 |
| N  | -1.16311600 | -1.40467300 | -0.07061100 |
| C  | -3.09632700 | -2.56034600 | -0.70168800 |
| C  | -2.62728500 | 1.17187300  | 0.11014900  |
| Fe | 0.09223400  | -0.03112200 | -0.56972100 |
| C  | -0.98094400 | -2.73155800 | 0.12021000  |
| C  | -2.24185500 | -3.43629300 | -0.15185000 |
| H  | -4.09976500 | -2.73232800 | -1.06616100 |
| N  | -1.30046000 | 1.39811900  | -0.13873200 |
| N  | 1.42313800  | 1.40232200  | -0.94052700 |
| C  | -3.28925400 | 2.38422600  | 0.43078200  |
| N  | 1.55285900  | -1.39535300 | -0.43506000 |
| C  | 0.24070300  | -3.33687900 | 0.35237600  |
| H  | -2.38440900 | -4.50193700 | -0.00379500 |
| C  | 1.22423700  | 2.77058500  | -0.88625900 |
| C  | -1.11739600 | 2.75714500  | -0.05404300 |
| C  | -2.34172200 | 3.38587700  | 0.32926000  |
| C  | 2.73442500  | 1.21023800  | -1.31367400 |
| H  | -4.34429800 | 2.46501000  | 0.65545400  |
| C  | 2.88028300  | -1.20490400 | -0.79354500 |
| C  | 1.45124300  | -2.68877700 | 0.02881900  |
| H  | 0.27348700  | -4.39888300 | 0.57613700  |
| C  | 0.07563500  | 3.40237900  | -0.42536700 |
| C  | 2.42311500  | 3.44367600  | -1.30143300 |
| C  | 3.35303300  | 2.47790400  | -1.58032300 |
| H  | -2.47860900 | 4.45328400  | 0.46292400  |
| C  | 3.40927100  | -0.01249600 | -1.27543800 |
| C  | 3.62253700  | -2.40071200 | -0.53036000 |
| C  | 2.74301400  | -3.31369100 | 0.00186200  |
| H  | 0.08682400  | 4.48893800  | -0.39097200 |
| H  | 2.53796700  | 4.52027400  | -1.35328100 |
| H  | 4.37923700  | 2.60782500  | -1.90442300 |
| H  | 4.46004900  | -0.00821200 | -1.55361900 |
| H  | 4.68259800  | -2.52414500 | -0.72135700 |
| H  | 2.94169000  | -4.33242900 | 0.31432500  |
| O  | -4.47842700 | -0.29139600 | 0.12866900  |
| C  | -3.27856500 | -0.10285200 | -0.10664700 |

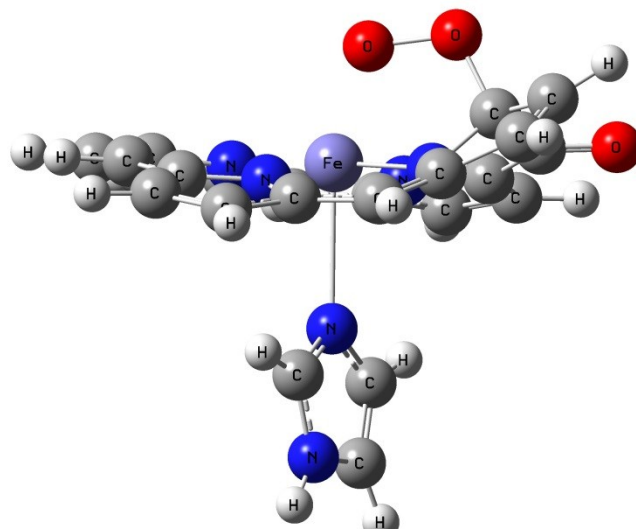

|    |             |             |             |
|----|-------------|-------------|-------------|
| O  | 1.91985600  | 0.68174600  | -2.04770000 |
| O  | 0.51118900  | 0.26051600  | -1.97251000 |
| N  | -0.58272200 | -0.27494200 | 1.67277800  |
| C  | -1.78382500 | -0.51505200 | 2.16982100  |
| C  | 0.29225100  | -0.25215700 | 2.73988100  |
| C  | -0.39672800 | -0.48300300 | 3.89755300  |
| N  | -1.71576200 | -0.64686000 | 3.51590700  |
| H  | -2.69583700 | -0.59091600 | 1.59878700  |
| H  | 1.34508300  | -0.07361300 | 2.59115000  |
| H  | -0.08254800 | -0.54580900 | 4.92742900  |
| H  | -2.49651300 | -0.83531100 | 4.12758000  |
| C  | 2.45275300  | 1.02401300  | -0.73463400 |
| N  | 1.30396000  | 1.31113700  | 0.10300300  |
| C  | 3.22253000  | 2.31908700  | -0.80122500 |
| C  | 2.55870200  | -1.39658100 | 0.00612000  |
| Fe | -0.07995500 | 0.04800000  | -0.29517400 |
| C  | 1.25026800  | 2.63035700  | 0.28517700  |
| C  | 2.51740600  | 3.25082400  | -0.14386100 |
| H  | 4.18021100  | 2.41672400  | -1.29299500 |
| N  | 1.21119800  | -1.47116200 | -0.11407400 |
| N  | -1.53566500 | -1.21598800 | -0.82237200 |
| C  | 3.12963400  | -2.67764100 | 0.23509200  |
| N  | -1.38085500 | 1.54558800  | -0.28502600 |
| C  | 0.07051400  | 3.33292100  | 0.57764500  |
| H  | 2.75436000  | 4.30097700  | -0.01870800 |
| C  | -1.45846000 | -2.60256100 | -0.81408300 |
| C  | 0.89623500  | -2.81211100 | -0.04265700 |
| C  | 2.08165500  | -3.57186200 | 0.20466600  |
| C  | -2.78616500 | -0.90799800 | -1.24495300 |
| H  | 4.18671100  | -2.86993500 | 0.35231200  |
| C  | -2.69453000 | 1.50585400  | -0.72035400 |
| C  | -1.16197800 | 2.80592900  | 0.20103100  |
| H  | 0.12694600  | 4.38223500  | 0.84513300  |
| C  | -0.35903900 | -3.32728300 | -0.38706400 |
| C  | -2.70023300 | -3.15885600 | -1.27762600 |
| C  | -3.52390500 | -2.10584300 | -1.56088500 |
| H  | 2.12195600  | -4.65056300 | 0.29252100  |
| C  | -3.33436300 | 0.40023100  | -1.22251900 |
| C  | -3.31846500 | 2.80035400  | -0.49016800 |
| C  | -2.39266200 | 3.58647700  | 0.10657000  |
| H  | -0.45855100 | -4.41005900 | -0.38245500 |
| H  | -2.90671900 | -4.21731200 | -1.37643700 |
| H  | -4.54082500 | -2.12874100 | -1.93178600 |
| H  | -4.36317900 | 0.51368400  | -1.55023800 |
| H  | -4.34132600 | 3.04329700  | -0.75028200 |
| H  | -2.48961900 | 4.61603200  | 0.42766700  |
| O  | 4.50906700  | -0.07279600 | -0.12597800 |
| C  | 3.29118700  | -0.15990600 | -0.23471800 |

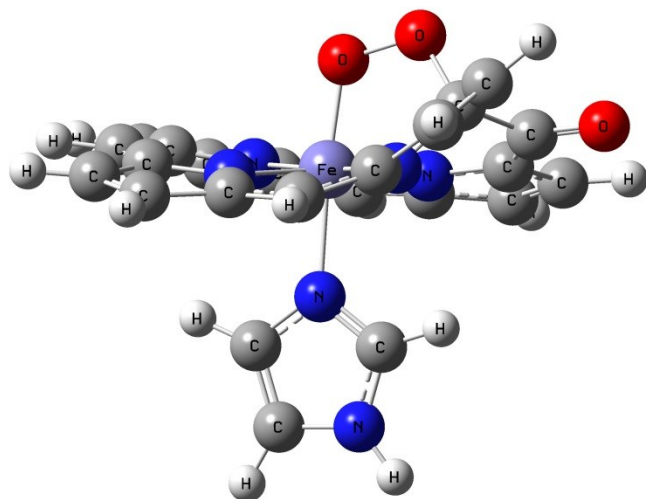

|    |             |             |             |
|----|-------------|-------------|-------------|
| O  | -2.06073600 | -0.88866200 | -2.12046500 |
| O  | -0.75123800 | -0.29483400 | -2.21873900 |
| N  | 0.52474500  | 0.30651900  | 1.95533100  |
| C  | 1.61462600  | -0.05148800 | 2.60559400  |
| C  | -0.31793700 | 0.85733500  | 2.89889100  |
| C  | 0.27584800  | 0.82820800  | 4.13263500  |
| N  | 1.51181500  | 0.24473700  | 3.92899200  |
| H  | 2.48329000  | -0.52133600 | 2.16840000  |
| H  | -1.29126100 | 1.23708700  | 2.62617600  |
| H  | -0.05201100 | 1.15567600  | 5.10717100  |
| H  | 2.21262800  | 0.06781500  | 4.63389900  |
| C  | -2.36321100 | -1.28642800 | -0.74602400 |
| N  | -1.10502000 | -1.45497800 | -0.05589700 |
| C  | -3.00357100 | -2.65266600 | -0.71659100 |
| C  | -2.65190500 | 1.12815200  | 0.01418300  |
| Fe | 0.12704000  | -0.03345700 | -0.48131100 |
| C  | -0.91305500 | -2.75348000 | 0.17094900  |
| C  | -2.15027600 | -3.49978200 | -0.12458400 |
| H  | -3.99243500 | -2.85143100 | -1.10546200 |
| N  | -1.33361100 | 1.36006800  | -0.16583600 |
| N  | 1.42079500  | 1.40259200  | -0.87932300 |
| C  | -3.36156400 | 2.33585900  | 0.28147500  |
| N  | 1.59327100  | -1.37114000 | -0.36689400 |
| C  | 0.33659300  | -3.32670900 | 0.44163500  |
| H  | -2.27415100 | -4.56314900 | 0.04303700  |
| C  | 1.18363500  | 2.77151400  | -0.86992100 |
| C  | -1.17677900 | 2.73268600  | -0.09713400 |
| C  | -2.43308000 | 3.34818300  | 0.20693400  |
| C  | 2.72155600  | 1.24315200  | -1.25452900 |
| H  | -4.42675800 | 2.39821300  | 0.45322200  |
| C  | 2.91174000  | -1.16860900 | -0.75004300 |
| C  | 1.50764100  | -2.66094400 | 0.09133600  |
| H  | 0.39356000  | -4.37516900 | 0.71079800  |
| C  | 0.00460900  | 3.37768400  | -0.45266900 |
| C  | 2.36110300  | 3.46408200  | -1.29023700 |
| C  | 3.31646800  | 2.51273300  | -1.54378900 |
| H  | -2.59675900 | 4.41396400  | 0.30737700  |
| C  | 3.42490600  | 0.01237300  | -1.21962100 |
| C  | 3.67305200  | -2.38222300 | -0.51015000 |
| C  | 2.82295900  | -3.28667300 | 0.03330200  |
| H  | -0.00642800 | 4.46468300  | -0.44627100 |
| H  | 2.44928700  | 4.53987500  | -1.37538400 |
| H  | 4.33704200  | 2.65911300  | -1.87353700 |
| H  | 4.47100100  | 0.03395800  | -1.50872700 |
| H  | 4.72715900  | -2.49874600 | -0.72973900 |
| H  | 3.03054100  | -4.30277700 | 0.34427800  |
| O  | -4.45886400 | -0.38462200 | 0.02024700  |
| C  | -3.26419300 | -0.18588400 | -0.16899100 |

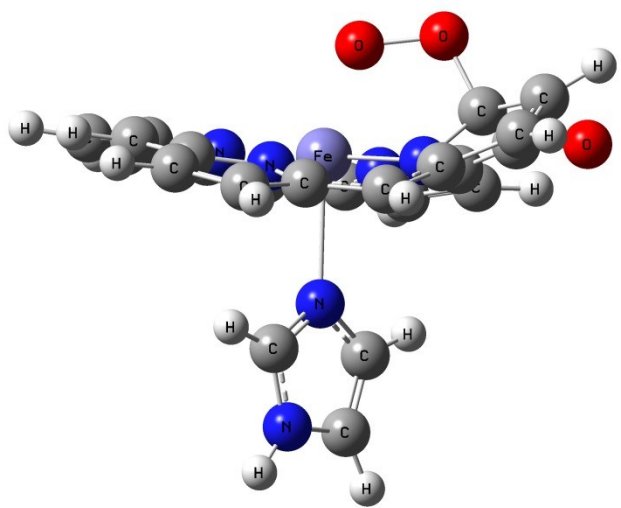

|    |             |             |             |
|----|-------------|-------------|-------------|
| O  | 2.98861200  | -0.18255500 | -2.02387700 |
| O  | -0.30016400 | -0.05399100 | -2.23824700 |
| N  | -0.17267000 | 0.09466900  | 1.66700100  |
| C  | -1.22771200 | -0.14170800 | 2.41713500  |
| C  | 0.86899400  | 0.36034400  | 2.52927400  |
| C  | 0.43029200  | 0.28251200  | 3.82402800  |
| N  | -0.91367000 | -0.03740000 | 3.73775100  |
| H  | -2.21253500 | -0.38246500 | 2.04618000  |
| H  | 1.86090100  | 0.57457400  | 2.16060000  |
| H  | 0.93040600  | 0.41635400  | 4.77095600  |
| H  | -1.54741900 | -0.17946500 | 4.50933300  |
| C  | 2.78696900  | 0.61869300  | -0.97383100 |
| N  | 1.40435900  | 1.13982500  | -0.67177500 |
| C  | 3.65834300  | 1.84596200  | -0.83298600 |
| C  | 2.22507100  | -1.65037200 | -0.05689200 |
| Fe | -0.22997800 | 0.02109700  | -0.62204600 |
| C  | 1.50582500  | 2.43027600  | -0.40787600 |
| C  | 2.90122400  | 2.89782400  | -0.51126500 |
| H  | 4.72908700  | 1.79544700  | -0.98199300 |
| N  | 0.89108000  | -1.59543300 | -0.25784700 |
| N  | -1.92897600 | -1.12592400 | -0.50200600 |
| C  | 2.65151800  | -2.98283900 | 0.21714600  |
| N  | -1.34842100 | 1.63106000  | -0.34904500 |
| C  | 0.43521400  | 3.29586200  | -0.09030400 |
| H  | 3.20050800  | 3.92776500  | -0.34003700 |
| C  | -1.98307600 | -2.50304600 | -0.52058200 |
| C  | 0.43717300  | -2.91211100 | -0.17998900 |
| C  | 1.53844800  | -3.77782900 | 0.10574700  |
| C  | -3.21493800 | -0.69723100 | -0.63759200 |
| H  | 3.67628200  | -3.25284900 | 0.42851300  |
| C  | -2.72914900 | 1.71128300  | -0.42526000 |
| C  | -0.88763700 | 2.91005600  | -0.14398700 |
| H  | 0.65854900  | 4.34472700  | 0.08137400  |
| C  | -0.87355700 | -3.32509400 | -0.34851300 |
| C  | -3.33671200 | -2.94440700 | -0.66939100 |
| C  | -4.11183200 | -1.81390700 | -0.74363400 |
| H  | 1.46527400  | -4.85540200 | 0.20050000  |
| C  | -3.59855400 | 0.65968800  | -0.59368000 |
| C  | -3.13959300 | 3.08982100  | -0.24307100 |
| C  | -2.01483300 | 3.82231800  | -0.04970200 |
| H  | -1.05251000 | -4.39801100 | -0.32409000 |
| H  | -3.65294400 | -3.98068600 | -0.70714100 |
| H  | -5.18759200 | -1.74050600 | -0.85441800 |
| H  | -4.65950800 | 0.88590600  | -0.65829200 |
| H  | -4.16985600 | 3.42661800  | -0.26151800 |
| H  | -1.92326000 | 4.88902700  | 0.11792000  |
| O  | 4.23825800  | -0.60973900 | 0.59464900  |
| C  | 3.16660400  | -0.50890300 | -0.00535000 |

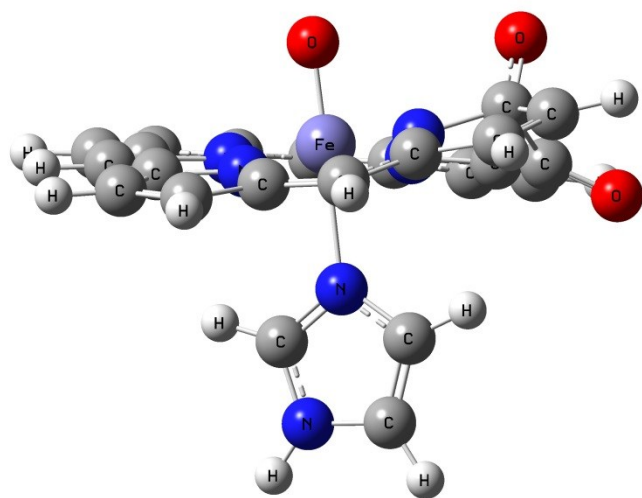



|    |             |             |             |
|----|-------------|-------------|-------------|
| O  | -2.98736000 | -0.15428400 | -2.01405200 |
| O  | 0.28235200  | 0.08543700  | -2.20908500 |
| N  | 0.20744200  | -0.06387000 | 1.66142600  |
| C  | 1.29566600  | 0.02491500  | 2.39740900  |
| C  | -0.84819500 | -0.20424000 | 2.53711700  |
| C  | -0.38387700 | -0.19964200 | 3.82464000  |
| N  | 0.98896900  | -0.05277700 | 3.72028100  |
| H  | 2.29886800  | 0.13966000  | 2.01563100  |
| H  | -1.86398800 | -0.29369900 | 2.18256600  |
| H  | -0.88332400 | -0.28189500 | 4.77767500  |
| H  | 1.64753400  | -0.00666700 | 4.48272300  |
| C  | -2.73686500 | -0.84646000 | -0.89826200 |
| N  | -1.30851900 | -1.24113300 | -0.57442100 |
| C  | -3.49616100 | -2.13897200 | -0.69913100 |
| C  | -2.39081100 | 1.51806100  | -0.12356800 |
| Fe | 0.22348500  | -0.00070300 | -0.59536000 |
| C  | -1.28910300 | -2.54261700 | -0.33004400 |
| C  | -2.64555300 | -3.12038400 | -0.39187100 |
| H  | -4.56990200 | -2.18178100 | -0.82718700 |
| N  | -1.05769600 | 1.55268800  | -0.30472700 |
| N  | 1.81948000  | 1.26528200  | -0.45158800 |
| C  | -2.92040000 | 2.82528400  | 0.11427600  |
| N  | 1.49246800  | -1.54682900 | -0.40682300 |
| C  | -0.14751900 | -3.33427300 | -0.08721100 |
| H  | -2.85138000 | -4.17196200 | -0.21455700 |
| C  | 1.76112900  | 2.64420400  | -0.46165800 |
| C  | -0.69917100 | 2.89751900  | -0.23258000 |
| C  | -1.86568600 | 3.69382600  | 0.01071400  |
| C  | 3.13874400  | 0.94088600  | -0.59737000 |
| H  | -3.96549400 | 3.02555400  | 0.30312700  |
| C  | 2.87003300  | -1.51181600 | -0.50235700 |
| C  | 1.14336200  | -2.85607500 | -0.21004100 |
| H  | -0.29072400 | -4.39826900 | 0.07634800  |
| C  | 0.58863300  | 3.38854400  | -0.33891500 |
| C  | 3.07500800  | 3.19106900  | -0.59350600 |
| C  | 3.93932800  | 2.12717900  | -0.67984900 |
| H  | -1.86825700 | 4.77472800  | 0.09550800  |
| C  | 3.64078500  | -0.37809200 | -0.61201500 |
| C  | 3.39871400  | -2.85759300 | -0.37322200 |
| C  | 2.34078400  | -3.68269000 | -0.17461000 |
| H  | 0.70038700  | 4.47064400  | -0.31315800 |
| H  | 3.30635900  | 4.24975800  | -0.62062900 |
| H  | 5.01726600  | 2.14197700  | -0.79180000 |
| H  | 4.71771500  | -0.50139300 | -0.69046300 |
| H  | 4.45231500  | -3.10897800 | -0.41896700 |
| H  | 2.33882900  | -4.75692000 | -0.03106200 |
| O  | -4.32150900 | 0.34659100  | 0.55225500  |
| C  | -3.23212500 | 0.30504400  | -0.02600600 |

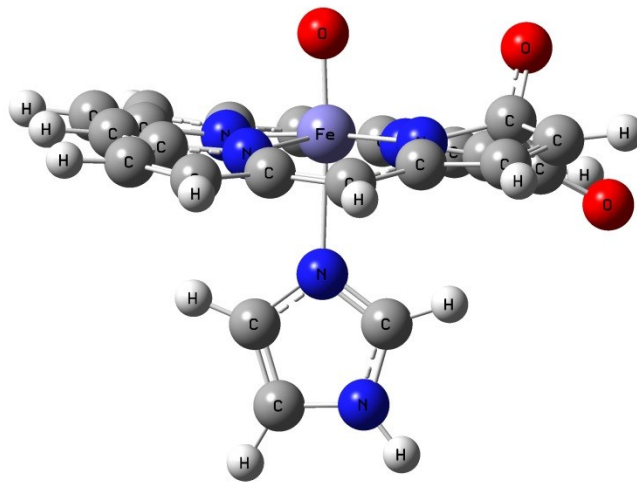

|    |             |             |             |
|----|-------------|-------------|-------------|
| O  | -2.82650600 | -0.13916000 | -2.26013300 |
| O  | 0.26582100  | 0.04350300  | -2.22357400 |
| N  | 0.23789900  | -0.03690800 | 1.66032500  |
| C  | 1.32958200  | 0.14373500  | 2.37348800  |
| C  | -0.78406800 | -0.25589100 | 2.55729000  |
| C  | -0.29797100 | -0.20542600 | 3.83603100  |
| N  | 1.05623800  | 0.05012200  | 3.70286400  |
| H  | 2.31135000  | 0.33560700  | 1.96821800  |
| H  | -1.79280000 | -0.43130000 | 2.21753900  |
| H  | -0.76981200 | -0.32127400 | 4.79967000  |
| H  | 1.72416000  | 0.15402900  | 4.45129400  |
| C  | -2.72806100 | -0.67916900 | -1.06901900 |
| N  | -1.40999200 | -1.10547500 | -0.55055900 |
| C  | -3.63669200 | -1.87252400 | -0.81226100 |
| C  | -2.28135800 | 1.65142700  | 0.02706800  |
| Fe | 0.21711900  | -0.00643700 | -0.60779400 |
| C  | -1.50496600 | -2.40592100 | -0.20667500 |
| C  | -2.89808800 | -2.86993100 | -0.31931000 |
| H  | -4.68883600 | -1.84451700 | -1.06057800 |
| N  | -0.94591300 | 1.62814600  | -0.30445600 |
| N  | 1.88578500  | 1.12941300  | -0.49989400 |
| C  | -2.68722400 | 2.96409400  | 0.38565000  |
| N  | 1.34599200  | -1.64477800 | -0.38025700 |
| C  | -0.45017400 | -3.25245900 | 0.10205100  |
| H  | -3.21186400 | -3.87689700 | -0.06246700 |
| C  | 1.92668900  | 2.50802800  | -0.53230300 |
| C  | -0.50403800 | 2.91789000  | -0.16651900 |
| C  | -1.57695700 | 3.76749100  | 0.23997300  |
| C  | 3.17187700  | 0.69324200  | -0.71170000 |
| H  | -3.69647100 | 3.23733600  | 0.66417100  |
| C  | 2.72136500  | -1.72882500 | -0.50824500 |
| C  | 0.89881900  | -2.89714300 | -0.06839300 |
| H  | -0.67722600 | -4.28400600 | 0.35506300  |
| C  | 0.83159800  | 3.33799700  | -0.34606700 |
| C  | 3.28147600  | 2.94690600  | -0.74658600 |
| C  | 4.05175400  | 1.82223400  | -0.86164200 |
| H  | -1.49530500 | 4.83556100  | 0.40655300  |
| C  | 3.56871800  | -0.64709700 | -0.70737700 |
| C  | 3.13958100  | -3.08602600 | -0.28738600 |
| C  | 2.01380400  | -3.80741600 | 0.00821900  |
| H  | 1.01646100  | 4.40886200  | -0.31192600 |
| H  | 3.59283600  | 3.98375100  | -0.80307300 |
| H  | 5.12081700  | 1.75426200  | -1.02918800 |
| H  | 4.62931200  | -0.85490300 | -0.82621300 |
| H  | 4.16695100  | -3.42995900 | -0.32982500 |
| H  | 1.93199700  | -4.86397800 | 0.23586500  |
| O  | -4.34112400 | 0.53276200  | 0.38152100  |
| C  | -3.21604400 | 0.57550400  | -0.09480500 |

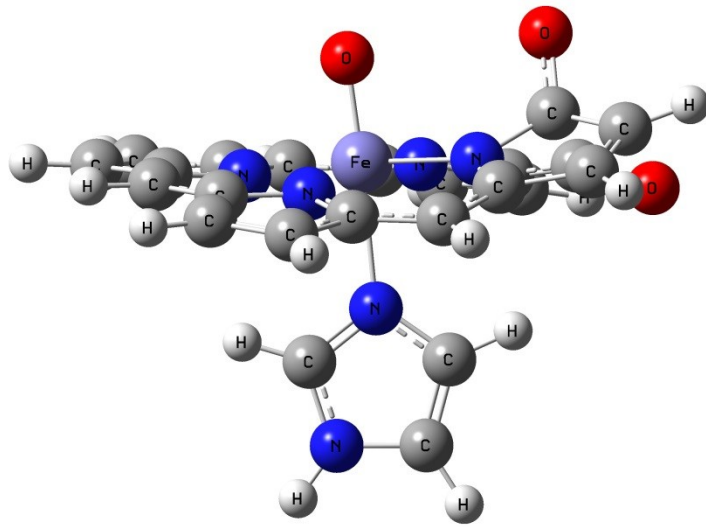

|    |             |             |             |
|----|-------------|-------------|-------------|
| O  | 2.75189200  | 0.24339000  | -2.22896900 |
| O  | -0.24980100 | -0.01130300 | -2.17727500 |
| N  | -0.24414000 | -0.00237000 | 1.66854800  |
| C  | -1.32349000 | -0.20448900 | 2.40168800  |
| C  | 0.79520900  | 0.18891300  | 2.55545000  |
| C  | 0.33188900  | 0.10007600  | 3.83952200  |
| N  | -1.02174800 | -0.15052300 | 3.72358700  |
| H  | -2.31603900 | -0.38499400 | 2.01926600  |
| H  | 1.80037000  | 0.37698100  | 2.21307800  |
| H  | 0.82303700  | 0.18728800  | 4.79605400  |
| H  | -1.67377700 | -0.27876600 | 4.48360100  |
| C  | 2.69079900  | 0.77211700  | -1.02250900 |
| N  | 1.35813800  | 1.17436300  | -0.50256500 |
| C  | 3.57146800  | 1.98843800  | -0.79374100 |
| C  | 2.33451700  | -1.61676800 | -0.03826300 |
| Fe | -0.22139100 | 0.01748500  | -0.55614400 |
| C  | 1.42829800  | 2.45982200  | -0.18091400 |
| C  | 2.80776600  | 2.97161200  | -0.31441100 |
| H  | 4.62221300  | 1.98453600  | -1.04725400 |
| N  | 0.99656600  | -1.59098600 | -0.30776400 |
| N  | -1.85380000 | -1.15292800 | -0.51720800 |
| C  | 2.77458500  | -2.92415200 | 0.29720400  |
| N  | -1.38730300 | 1.61227000  | -0.34718000 |
| C  | 0.33326600  | 3.28398400  | 0.14111800  |
| H  | 3.09427100  | 3.98837000  | -0.07165700 |
| C  | -1.85700400 | -2.54272800 | -0.55448300 |
| C  | 0.57835100  | -2.89297700 | -0.17813100 |
| C  | 1.66929800  | -3.73714800 | 0.17977700  |
| C  | -3.13133000 | -0.76409400 | -0.73273600 |
| H  | 3.79518600  | -3.18885400 | 0.53537600  |
| C  | -2.75594500 | 1.66034100  | -0.50171800 |
| C  | -0.97746800 | 2.87868200  | -0.03831300 |
| H  | 0.52750800  | 4.32084000  | 0.39215700  |
| C  | -0.74797200 | -3.33053000 | -0.36534600 |
| C  | -3.19852700 | -3.01706700 | -0.78549400 |
| C  | -3.99105600 | -1.91515100 | -0.90118100 |
| H  | 1.60931800  | -4.80906400 | 0.32039900  |
| C  | -3.57403000 | 0.57995600  | -0.72107200 |
| C  | -3.21975400 | 3.02850200  | -0.29731500 |
| C  | -2.13495300 | 3.77020500  | 0.01639800  |
| H  | -0.90430100 | -4.40625300 | -0.35216800 |
| H  | -3.48248600 | -4.05981300 | -0.85265800 |
| H  | -5.05749400 | -1.86870200 | -1.08170500 |
| H  | -4.63667400 | 0.75879300  | -0.84971100 |
| H  | -4.25324500 | 3.34276200  | -0.37364100 |
| H  | -2.08198600 | 4.82734100  | 0.24415900  |
| O  | 4.38245500  | -0.47012300 | 0.26746500  |
| C  | 3.24273400  | -0.49913900 | -0.14340500 |

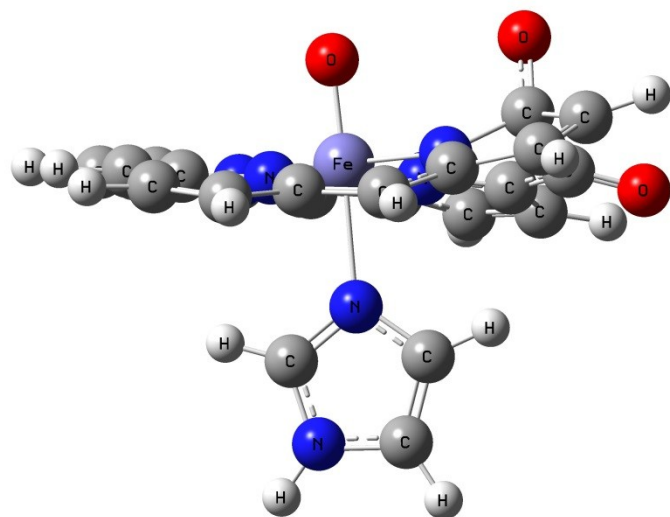

|    |             |             |             |
|----|-------------|-------------|-------------|
| O  | 2.75438600  | 0.24686900  | -2.22723000 |
| O  | -0.25011100 | -0.00741800 | -2.17518600 |
| N  | -0.24447600 | -0.00348600 | 1.67188800  |
| C  | -1.32355200 | -0.20668100 | 2.40515000  |
| C  | 0.79501300  | 0.18840800  | 2.55847100  |
| C  | 0.33199500  | 0.09892400  | 3.84262900  |
| N  | -1.02147400 | -0.15283400 | 3.72694200  |
| H  | -2.31593800 | -0.38821900 | 2.02273800  |
| H  | 1.79991600  | 0.37756200  | 2.21584900  |
| H  | 0.82324700  | 0.18642600  | 4.79907900  |
| H  | -1.67319600 | -0.28185200 | 4.48710100  |
| C  | 2.69076400  | 0.77573900  | -1.02112000 |
| N  | 1.35694500  | 1.17528900  | -0.50007200 |
| C  | 3.56833200  | 1.99421700  | -0.79252400 |
| C  | 2.33741500  | -1.61434500 | -0.04106900 |
| Fe | -0.22136600 | 0.01732800  | -0.55695100 |
| C  | 1.42400400  | 2.46207700  | -0.18089600 |
| C  | 2.80213100  | 2.97655000  | -0.31538700 |
| H  | 4.61899800  | 1.99285200  | -1.04644400 |
| N  | 0.99981000  | -1.59027000 | -0.31095000 |
| N  | -1.85242400 | -1.15556700 | -0.51356700 |
| C  | 2.77947400  | -2.92155800 | 0.29312500  |
| N  | -1.39073500 | 1.61121600  | -0.34870100 |
| C  | 0.32786400  | 3.28485100  | 0.13935000  |
| H  | 3.08610600  | 3.99445000  | -0.07446700 |
| C  | -1.85309700 | -2.54538600 | -0.55412200 |
| C  | 0.58325700  | -2.89309200 | -0.18222000 |
| C  | 1.67560100  | -3.73608200 | 0.17480600  |
| C  | -3.13069000 | -0.76841800 | -0.73016900 |
| H  | 3.80044600  | -3.18463700 | 0.53153100  |
| C  | -2.75938800 | 1.65698800  | -0.50245300 |
| C  | -0.98257200 | 2.87806500  | -0.04075700 |
| H  | 0.52073100  | 4.32229000  | 0.38904100  |
| C  | -0.74259000 | -3.33196100 | -0.36762700 |
| C  | -3.19343300 | -3.02142900 | -0.78730800 |
| C  | -3.98784000 | -1.92059400 | -0.90182200 |
| H  | 1.61700000  | -4.80813000 | 0.31495100  |
| C  | -3.57576700 | 0.57468500  | -0.71890800 |
| C  | -3.22510700 | 3.02470800  | -0.29928500 |
| C  | -2.14118200 | 3.76825300  | 0.01319800  |
| H  | -0.89754900 | -4.40790100 | -0.35591300 |
| H  | -3.47546300 | -4.06451200 | -0.85729800 |
| H  | -5.05410500 | -1.87577700 | -1.08377700 |
| H  | -4.63876700 | 0.75143700  | -0.84752700 |
| H  | -4.25912200 | 3.33734300  | -0.37506500 |
| H  | -2.08956900 | 4.82561600  | 0.24017600  |
| O  | 4.38232400  | -0.46357200 | 0.27133800  |
| C  | 3.24378000  | -0.49473800 | -0.14262900 |

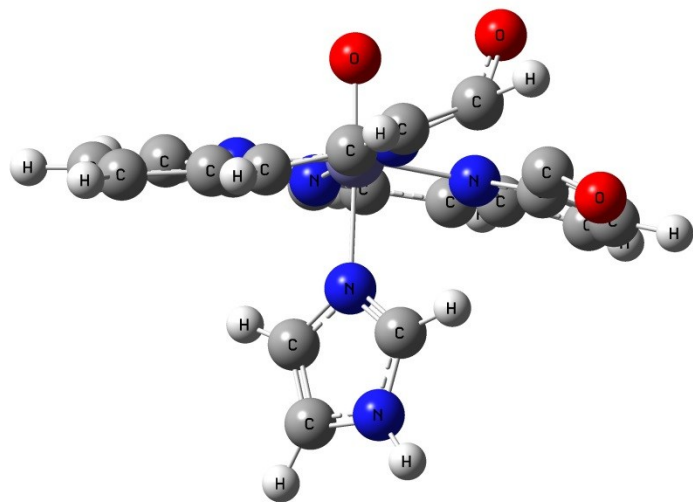



|    |             |             |             |
|----|-------------|-------------|-------------|
| O  | 2.82878200  | 0.50263100  | -1.48687700 |
| O  | -0.74361000 | 0.05532500  | -2.32170800 |
| N  | 0.09915000  | -0.00938100 | 1.49847900  |
| C  | 0.15697000  | -1.09536800 | 2.24151500  |
| C  | 0.45262100  | 1.04100400  | 2.31869300  |
| C  | 0.72763100  | 0.57690200  | 3.57753500  |
| N  | 0.52539200  | -0.79095500 | 3.51504400  |
| H  | -0.05449600 | -2.09746800 | 1.90028700  |
| H  | 0.48674800  | 2.05066800  | 1.93891100  |
| H  | 1.02852900  | 1.07304700  | 4.48763400  |
| H  | 0.67594100  | -1.45503900 | 4.25878600  |
| C  | 2.10821300  | 1.59775400  | -1.11581200 |
| N  | 0.81119800  | 1.60675400  | -0.78940700 |
| C  | 2.69769800  | 2.87772100  | -1.10080300 |
| C  | 2.43113500  | -0.76795400 | -1.20047300 |
| Fe | -0.46857500 | 0.02177000  | -0.70792800 |
| C  | 0.50868700  | 2.95044800  | -0.56310000 |
| C  | 1.66556300  | 3.74303100  | -0.74554800 |
| H  | 3.73403300  | 3.09461100  | -1.32123800 |
| N  | 1.18362900  | -1.15341400 | -0.90782300 |
| N  | -1.57203100 | -1.57146200 | -0.33931100 |
| C  | 3.34576200  | -1.83985000 | -1.26121700 |
| N  | -1.94288000 | 1.21533500  | -0.19141200 |
| C  | -0.78083600 | 3.39361800  | -0.23477300 |
| H  | 1.70784000  | 4.82122900  | -0.64037700 |
| C  | -1.16123400 | -2.90595400 | -0.36415600 |
| C  | 1.25453800  | -2.54184000 | -0.79346100 |
| C  | 2.58177400  | -2.97735000 | -1.00355400 |
| C  | -2.92063800 | -1.58591500 | -0.11986100 |
| H  | 4.40072900  | -1.75306400 | -1.48319800 |
| C  | -3.24274500 | 0.85198700  | 0.01949300  |
| C  | -1.89738100 | 2.60535300  | -0.07147800 |
| H  | -0.91122700 | 4.46656300  | -0.10656100 |
| C  | 0.12924800  | -3.34664700 | -0.55380000 |
| C  | -2.29967300 | -3.76014600 | -0.13966700 |
| C  | -3.38696000 | -2.95261600 | 0.00360300  |
| H  | 2.91177500  | -4.00982500 | -0.98419000 |
| C  | -3.72734900 | -0.45717200 | 0.01421500  |
| C  | -4.04704400 | 2.02537000  | 0.28972700  |
| C  | -3.21205100 | 3.10078600  | 0.23935600  |
| H  | 0.29372800  | -4.42231900 | -0.53091500 |
| H  | -2.25609300 | -4.84330200 | -0.10445300 |
| H  | -4.41781400 | -3.23466800 | 0.18465700  |
| H  | -4.78781500 | -0.60740400 | 0.19442200  |
| H  | -5.11084200 | 2.00541500  | 0.49656300  |
| H  | -3.45215100 | 4.14743200  | 0.39132800  |
| O  | 4.59269000  | 0.13397300  | 1.63282500  |
| C  | 3.74606700  | -0.60240300 | 1.83549500  |

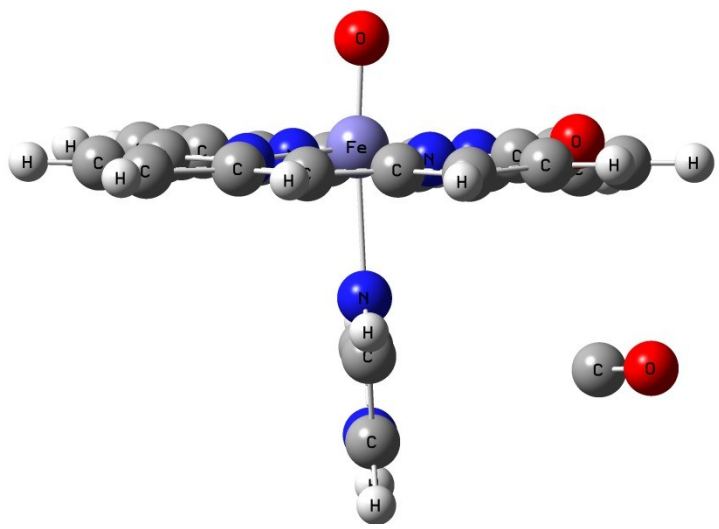

|    |             |             |             |
|----|-------------|-------------|-------------|
| O  | 2.90341400  | -0.75944800 | -0.73923000 |
| O  | -0.73082400 | 0.04255300  | -2.24143300 |
| N  | 0.08680500  | -0.00711700 | 1.52368400  |
| C  | 0.09765500  | -1.08843000 | 2.27351700  |
| C  | 0.42412500  | 1.04579500  | 2.34312100  |
| C  | 0.64371800  | 0.58827400  | 3.61543600  |
| N  | 0.42271200  | -0.77772600 | 3.55656900  |
| H  | -0.12041200 | -2.08742900 | 1.92718700  |
| H  | 0.47916300  | 2.05048100  | 1.95243500  |
| H  | 0.91811700  | 1.08677900  | 4.53250700  |
| H  | 0.53191400  | -1.43616800 | 4.31255400  |
| C  | 2.54909500  | 0.53604000  | -1.01336100 |
| N  | 1.31801300  | 1.04165900  | -0.84986700 |
| C  | 3.49658500  | 1.50193100  | -1.38520800 |
| C  | 2.00379900  | -1.77872500 | -0.91570800 |
| Fe | -0.40771100 | 0.02853100  | -0.65477600 |
| C  | 1.44395100  | 2.40592000  | -1.12309900 |
| C  | 2.78289500  | 2.70263600  | -1.45078300 |
| H  | 4.54869300  | 1.31855200  | -1.55601000 |
| N  | 0.67753600  | -1.66517400 | -0.74555400 |
| N  | -2.02247000 | -1.02857500 | -0.16575200 |
| C  | 2.41270200  | -3.09206400 | -1.18787800 |
| N  | -1.36940200 | 1.72666800  | -0.27053900 |
| C  | 0.38204800  | 3.31523100  | -0.96533000 |
| H  | 3.16434200  | 3.68869800  | -1.69023000 |
| C  | -2.17651800 | -2.40458600 | -0.34046000 |
| C  | 0.17531600  | -2.95899100 | -0.90901400 |
| C  | 1.23528500  | -3.84848400 | -1.17747200 |
| C  | -3.23525200 | -0.53712800 | 0.21964800  |
| H  | 3.43288300  | -3.41330000 | -1.34941300 |
| C  | -2.66691100 | 1.86086500  | 0.12664300  |
| C  | -0.89372200 | 3.00900700  | -0.54997500 |
| H  | 0.60422700  | 4.36328400  | -1.15626600 |
| C  | -1.18108800 | -3.28129700 | -0.70483200 |
| C  | -3.53286700 | -2.76950900 | -0.02018800 |
| C  | -4.18393800 | -1.62772600 | 0.34032900  |
| H  | 1.13164800  | -4.91648700 | -1.33252200 |
| C  | -3.54148600 | 0.81036600  | 0.42015700  |
| C  | -3.02472300 | 3.26526900  | 0.14826000  |
| C  | -1.93659300 | 3.96460500  | -0.28371600 |
| H  | -1.45547100 | -4.32907300 | -0.81072900 |
| H  | -3.92325300 | -3.78058500 | -0.06285800 |
| H  | -5.21810700 | -1.50974100 | 0.64348100  |
| H  | -4.55493800 | 1.06216900  | 0.71867900  |
| H  | -3.99692700 | 3.64591600  | 0.44006100  |
| H  | -1.83328200 | 5.03715100  | -0.40752900 |
| O  | 4.46382900  | 0.32305700  | 1.95168600  |
| C  | 3.72728300  | -0.51891600 | 2.16572600  |

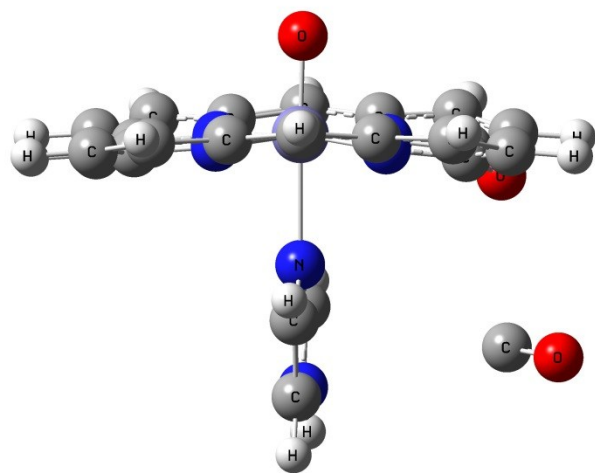

|    |             |             |             |
|----|-------------|-------------|-------------|
| O  | 2.91401800  | 0.67476800  | -1.14536800 |
| O  | -0.70914100 | 0.02624000  | -2.26434900 |
| N  | 0.01589000  | -0.02164400 | 1.50517200  |
| C  | 0.40853900  | -1.08264800 | 2.17980900  |
| C  | -0.06132700 | 1.01584100  | 2.40857600  |
| C  | 0.29348300  | 0.56990500  | 3.65327100  |
| N  | 0.58735900  | -0.77418400 | 3.49156600  |
| H  | 0.57390500  | -2.06379900 | 1.76013500  |
| H  | -0.36625200 | 2.00155600  | 2.09165400  |
| H  | 0.36014300  | 1.06171500  | 4.61155000  |
| H  | 0.90810500  | -1.41018700 | 4.20536500  |
| C  | 2.07645900  | 1.72195300  | -0.97762500 |
| N  | 0.75531700  | 1.65306200  | -0.71670800 |
| C  | 2.55955700  | 3.04062800  | -1.05918900 |
| C  | 2.53518100  | -0.62005100 | -1.07631900 |
| Fe | -0.40336100 | 0.00833100  | -0.67506100 |
| C  | 0.33633000  | 2.98172400  | -0.63605700 |
| C  | 1.44806700  | 3.84578900  | -0.83929100 |
| H  | 3.58691000  | 3.31921600  | -1.25080900 |
| N  | 1.28582800  | -1.07652800 | -0.85109500 |
| N  | -1.45492700 | -1.67717100 | -0.33993600 |
| C  | 3.47940300  | -1.64944300 | -1.25034700 |
| N  | -1.99969200 | 1.13573200  | -0.20093800 |
| C  | -0.98037400 | 3.37231000  | -0.38039800 |
| H  | 1.40219300  | 4.92825800  | -0.82263400 |
| C  | -1.00418900 | -2.96868800 | -0.45314700 |
| C  | 1.39794900  | -2.46736000 | -0.89501500 |
| C  | 2.75128600  | -2.83016700 | -1.13740400 |
| C  | -2.81402800 | -1.75661300 | -0.08349700 |
| H  | 4.53231200  | -1.50438300 | -1.45146100 |
| C  | -3.28584300 | 0.67740400  | 0.03459600  |
| C  | -2.06603400 | 2.50623000  | -0.18864200 |
| H  | -1.18243400 | 4.43963300  | -0.34200600 |
| C  | 0.32697200  | -3.34412200 | -0.69821600 |
| C  | -2.09071400 | -3.88401500 | -0.25053100 |
| C  | -3.21470300 | -3.12597300 | -0.02203800 |
| H  | 3.11638600  | -3.84750500 | -1.21307200 |
| C  | -3.65731000 | -0.66120700 | 0.09463000  |
| C  | -4.16907100 | 1.78895800  | 0.21205300  |
| C  | -3.41478500 | 2.92696500  | 0.07474800  |
| H  | 0.54011000  | -4.40832400 | -0.75863700 |
| H  | -2.00166100 | -4.96396700 | -0.28294100 |
| H  | -4.22683500 | -3.46503500 | 0.16866900  |
| H  | -4.70589000 | -0.87375600 | 0.29087900  |
| H  | -5.23118600 | 1.70645500  | 0.41407900  |
| H  | -3.73561000 | 3.96026000  | 0.14210700  |
| O  | 4.52841700  | 0.42592900  | 1.67939400  |
| C  | 3.93222100  | -0.52193800 | 1.89250800  |

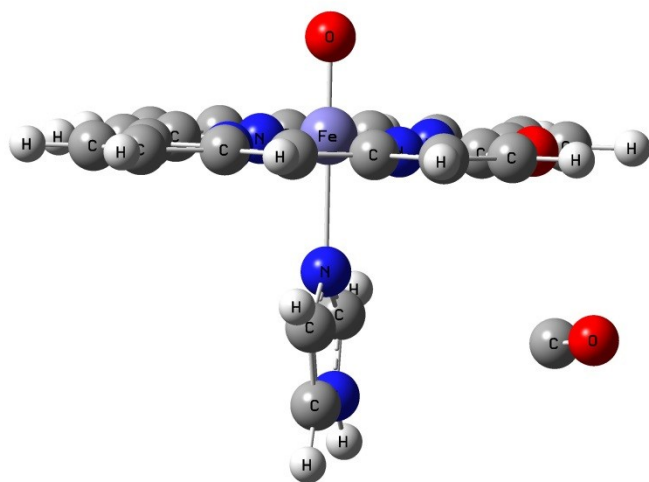

|    |             |             |             |
|----|-------------|-------------|-------------|
| O  | 3.00337100  | -0.00424200 | -1.10459200 |
| O  | -0.66946400 | 0.03880700  | -2.24901600 |
| N  | 0.03342500  | -0.00977100 | 1.50733900  |
| C  | 0.05779400  | -1.08451700 | 2.27455000  |
| C  | 0.26511600  | 1.06691900  | 2.33879500  |
| C  | 0.43077400  | 0.62912200  | 3.62486800  |
| N  | 0.28828900  | -0.74383800 | 3.56618000  |
| H  | -0.08826700 | -2.09930300 | 1.93820300  |
| H  | 0.28986600  | 2.07443600  | 1.95424900  |
| H  | 0.62078900  | 1.14995200  | 4.55029900  |
| H  | 0.38058400  | -1.38856000 | 4.33737900  |
| C  | 2.38163600  | 1.19079200  | -1.02481500 |
| N  | 1.08404200  | 1.38974600  | -0.78802100 |
| C  | 3.11764300  | 2.39197200  | -1.19701500 |
| C  | 2.36392300  | -1.19155200 | -1.04507400 |
| Fe | -0.37506100 | 0.01813000  | -0.65756700 |
| C  | 0.92696300  | 2.77821800  | -0.81877400 |
| C  | 2.18685100  | 3.39972900  | -1.06718000 |
| H  | 4.17890200  | 2.45167600  | -1.39075100 |
| N  | 1.06166300  | -1.37573300 | -0.82008400 |
| N  | -1.73159900 | -1.39808600 | -0.29024000 |
| C  | 3.08347800  | -2.40042800 | -1.23043000 |
| N  | -1.70732400 | 1.44405200  | -0.25363500 |
| C  | -0.28685300 | 3.42040100  | -0.60948800 |
| H  | 2.34891800  | 4.46778500  | -1.13600900 |
| C  | -1.55042000 | -2.76122400 | -0.41456800 |
| C  | 0.88477000  | -2.76049000 | -0.87399400 |
| C  | 2.13640300  | -3.39678800 | -1.12336200 |
| C  | -3.05531800 | -1.20759800 | -0.01015100 |
| H  | 4.14405600  | -2.47306100 | -1.42412100 |
| C  | -3.03291400 | 1.26885000  | 0.02549000  |
| C  | -1.50388500 | 2.80583800  | -0.34265800 |
| H  | -0.28176200 | 4.50618600  | -0.65398000 |
| C  | -0.34109700 | -3.38863700 | -0.68540100 |
| C  | -2.79883300 | -3.44120300 | -0.18561500 |
| C  | -3.73216000 | -2.48054800 | 0.06912400  |
| H  | 2.28297800  | -4.46577400 | -1.21052200 |
| C  | -3.67072000 | 0.03384800  | 0.15919600  |
| C  | -3.68796200 | 2.55010600  | 0.14133100  |
| C  | -2.73906800 | 3.50098400  | -0.09167800 |
| H  | -0.35213100 | -4.47323000 | -0.75334600 |
| H  | -2.93158900 | -4.51549800 | -0.22033100 |
| H  | -4.78584000 | -2.60583900 | 0.28409900  |
| H  | -4.73346100 | 0.04027100  | 0.37964000  |
| H  | -4.73844100 | 2.68731800  | 0.36436500  |
| H  | -2.85276300 | 4.57793800  | -0.09649300 |
| O  | 4.28953500  | 0.21626600  | 1.86243900  |
| C  | 3.57767000  | -0.51661500 | 2.36228700  |

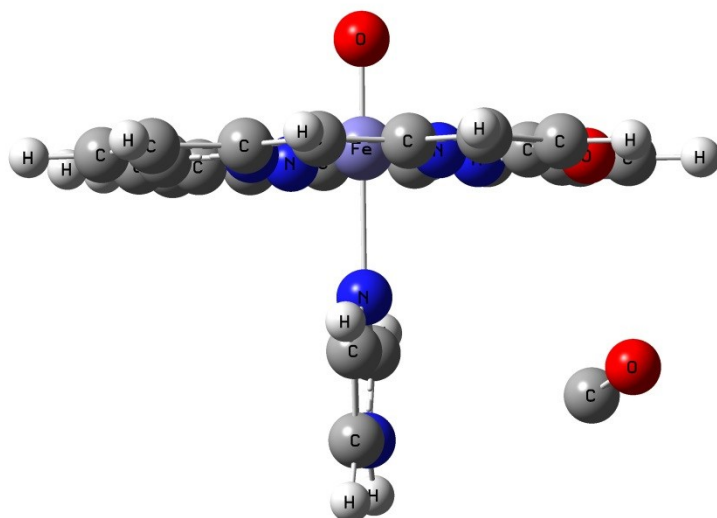



|    |             |             |             |
|----|-------------|-------------|-------------|
| O  | -2.93109200 | 0.26006600  | -1.12626500 |
| O  | 0.64276100  | 0.00780700  | -2.21615200 |
| N  | 0.12608900  | -0.00694500 | 1.57140000  |
| C  | 1.11018200  | -0.05377400 | 2.45111200  |
| C  | -1.04579000 | 0.03257700  | 2.29992800  |
| C  | -0.75789000 | 0.00925300  | 3.63705000  |
| N  | 0.62090700  | -0.04600100 | 3.71572600  |
| H  | 2.16243100  | -0.09351400 | 2.21513500  |
| H  | -2.01335700 | 0.07196700  | 1.82475900  |
| H  | -1.38535200 | 0.02601700  | 4.51439400  |
| H  | 1.17230900  | -0.07524800 | 4.56078600  |
| C  | -2.40483700 | -0.97591200 | -0.97801400 |
| N  | -1.13015000 | -1.25944000 | -0.70417500 |
| C  | -3.23020700 | -2.12458900 | -1.08571700 |
| C  | -2.22821800 | 1.39887300  | -0.94137000 |
| Fe | 0.42221400  | 0.00186000  | -0.61236300 |
| C  | -1.08138300 | -2.65362000 | -0.64181800 |
| C  | -2.38259700 | -3.19051300 | -0.86618700 |
| H  | -4.28897700 | -2.11702300 | -1.30173100 |
| N  | -0.92569700 | 1.48199000  | -0.66589800 |
| N  | 1.89844900  | 1.30516000  | -0.28043900 |
| C  | -2.87422900 | 2.66006200  | -1.01350800 |
| N  | 1.68765700  | -1.51405800 | -0.31817100 |
| C  | 0.08792200  | -3.37828200 | -0.44598300 |
| H  | -2.62606500 | -4.24520700 | -0.87172600 |
| C  | 1.78111500  | 2.67975900  | -0.24474900 |
| C  | -0.67072200 | 2.85122700  | -0.56387700 |
| C  | -1.87864900 | 3.58146300  | -0.76768100 |
| C  | 3.23452600  | 1.02854200  | -0.19164800 |
| H  | -3.92299500 | 2.81530300  | -1.22262700 |
| C  | 3.04936800  | -1.44091100 | -0.22075800 |
| C  | 1.36743200  | -2.85634100 | -0.31703100 |
| H  | -0.00581500 | -4.46082200 | -0.42741100 |
| C  | 0.59242600  | 3.38878800  | -0.35391400 |
| C  | 3.08373100  | 3.27646200  | -0.10986300 |
| C  | 3.98752600  | 2.25538300  | -0.08279900 |
| H  | -1.96305400 | 4.66030400  | -0.74172400 |
| C  | 3.78671200  | -0.25517600 | -0.16584400 |
| C  | 3.61166500  | -2.76854100 | -0.14120100 |
| C  | 2.56690100  | -3.64300400 | -0.19480000 |
| H  | 0.66036200  | 4.47239500  | -0.30669800 |
| H  | 3.27127000  | 4.34168300  | -0.05532500 |
| H  | 5.06547000  | 2.31193900  | 0.00149300  |
| H  | 4.86649100  | -0.33708100 | -0.09131300 |
| H  | 4.66887000  | -2.98623000 | -0.05636500 |
| H  | 2.59402000  | -4.72525300 | -0.16616800 |
| O  | -5.82122000 | -0.06962000 | 1.06191100  |
| C  | -4.75457900 | 0.00851700  | 1.44882400  |

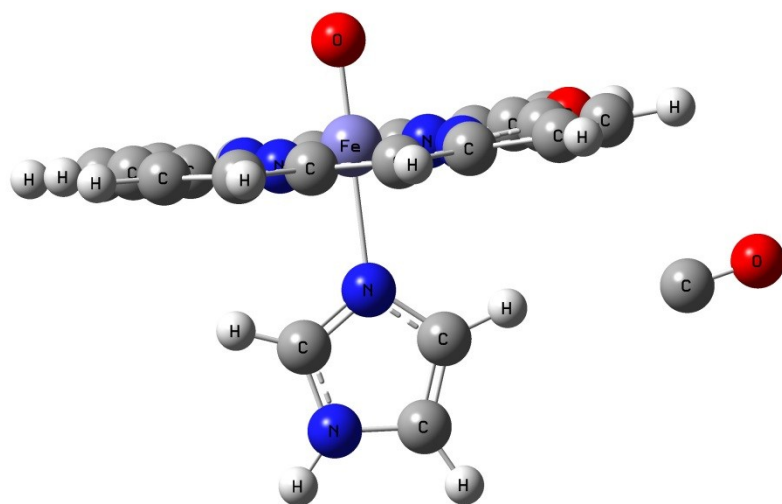

## <sup>2</sup>TS1

| 1  | 8  | 0 | 1.880704  | 0.863709  | -2.070745 |
|----|----|---|-----------|-----------|-----------|
| 2  | 8  | 0 | 0.450460  | 0.251745  | -1.988155 |
| 3  | 7  | 0 | -0.555394 | -0.306944 | 1.734483  |
| 4  | 6  | 0 | -0.229950 | -1.389766 | 2.446459  |
| 5  | 6  | 0 | -1.179641 | 0.580890  | 2.616780  |
| 6  | 6  | 0 | -1.227594 | 0.019181  | 3.867032  |
| 7  | 7  | 0 | -0.624450 | -1.228238 | 3.744205  |
| 8  | 1  | 0 | 0.276456  | -2.260998 | 2.075562  |
| 9  | 1  | 0 | -1.534389 | 1.539953  | 2.292689  |
| 10 | 1  | 0 | -1.620003 | 0.385040  | 4.799395  |
| 11 | 1  | 0 | -0.490183 | -1.898821 | 4.483323  |
| 12 | 6  | 0 | 2.336768  | 1.318617  | -0.714963 |
| 13 | 7  | 0 | 1.097187  | 1.494999  | 0.049196  |
| 14 | 6  | 0 | 2.937730  | 2.697798  | -0.808595 |
| 15 | 6  | 0 | 2.717909  | -1.048307 | 0.058615  |
| 16 | 26 | 0 | -0.109372 | 0.031039  | -0.282978 |
| 17 | 6  | 0 | 0.884313  | 2.815390  | 0.184841  |
| 18 | 6  | 0 | 2.087361  | 3.565979  | -0.230234 |
| 19 | 1  | 0 | 3.898975  | 2.890593  | -1.257441 |
| 20 | 7  | 0 | 1.384473  | -1.316004 | -0.104679 |
| 21 | 7  | 0 | -1.384762 | -1.435211 | -0.785178 |
| 22 | 6  | 0 | 3.461145  | -2.248909 | 0.237050  |
| 23 | 7  | 0 | -1.595223 | 1.356497  | -0.308709 |
| 24 | 6  | 0 | -0.378762 | 3.386380  | 0.404378  |
| 25 | 1  | 0 | 2.190394  | 4.638607  | -0.143840 |
| 26 | 6  | 0 | -1.100746 | -2.809851 | -0.844158 |
| 27 | 6  | 0 | 1.271251  | -2.704907 | -0.123105 |
| 28 | 6  | 0 | 2.556266  | -3.290165 | 0.120002  |
| 29 | 6  | 0 | -2.690459 | -1.299086 | -1.162554 |
| 30 | 1  | 0 | 4.529997  | -2.294447 | 0.373107  |
| 31 | 6  | 0 | -2.916502 | 1.113827  | -0.701190 |
| 32 | 6  | 0 | -1.533508 | 2.686703  | 0.076640  |
| 33 | 1  | 0 | -0.452726 | 4.446442  | 0.613193  |
| 34 | 6  | 0 | 0.101858  | -3.385278 | -0.491460 |
| 35 | 6  | 0 | -2.274776 | -3.521586 | -1.295510 |
| 36 | 6  | 0 | -3.254811 | -2.589502 | -1.501605 |
| 37 | 1  | 0 | 2.760070  | -4.351157 | 0.148369  |
| 38 | 6  | 0 | -3.415486 | -0.087882 | -1.132653 |
| 39 | 6  | 0 | -3.696122 | 2.334994  | -0.536635 |
| 40 | 6  | 0 | -2.863074 | 3.286173  | -0.038984 |
| 41 | 1  | 0 | 0.166182  | -4.468279 | -0.548703 |
| 42 | 1  | 0 | -2.329944 | -4.591439 | -1.437163 |
| 43 | 1  | 0 | -4.267858 | -2.748176 | -1.841146 |
| 44 | 1  | 0 | -4.458255 | -0.127834 | -1.428135 |
| 45 | 1  | 0 | -4.746271 | 2.424195  | -0.774948 |
| 46 | 1  | 0 | -3.089310 | 4.314293  | 0.203896  |
| 47 | 8  | 0 | 4.487570  | 0.527216  | 0.031421  |
| 48 | 6  | 0 | 3.274805  | 0.268969  | -0.144507 |

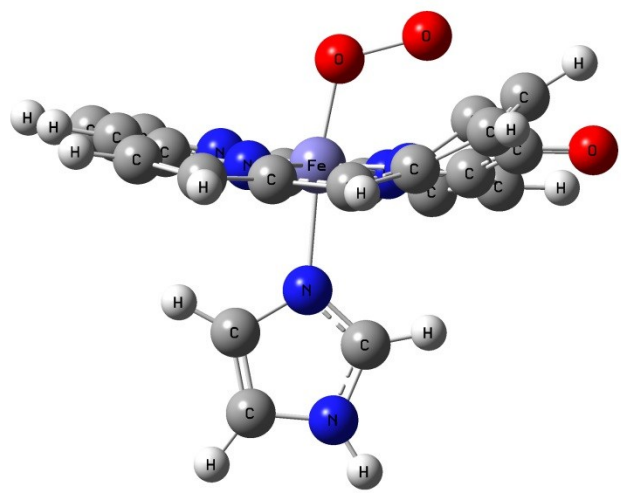

### <sup>3</sup>TS1

|    |    |   |           |           |           |
|----|----|---|-----------|-----------|-----------|
| 1  | 8  | 0 | 1.916758  | 0.594810  | -2.189289 |
| 2  | 8  | 0 | 0.497715  | 0.277549  | -2.029704 |
| 3  | 7  | 0 | -0.559969 | -0.220253 | 1.661477  |
| 4  | 6  | 0 | -1.777696 | -0.399467 | 2.165740  |
| 5  | 6  | 0 | 0.338763  | -0.218612 | 2.726208  |
| 6  | 6  | 0 | -0.354308 | -0.401310 | 3.896338  |
| 7  | 7  | 0 | -1.697560 | -0.514112 | 3.528297  |
| 8  | 1  | 0 | -2.688019 | -0.441452 | 1.595236  |
| 9  | 1  | 0 | 1.390857  | -0.086551 | 2.551993  |
| 10 | 1  | 0 | -0.030469 | -0.460915 | 4.920660  |
| 11 | 1  | 0 | -2.474597 | -0.655444 | 4.151212  |
| 12 | 6  | 0 | 2.563170  | 1.106686  | -0.494387 |
| 13 | 7  | 0 | 1.316525  | 1.348172  | 0.102568  |
| 14 | 6  | 0 | 3.283343  | 2.381331  | -0.586029 |
| 15 | 6  | 0 | 2.608780  | -1.346721 | -0.011998 |
| 16 | 26 | 0 | -0.082642 | 0.040675  | -0.302242 |
| 17 | 6  | 0 | 1.186162  | 2.717649  | 0.227181  |
| 18 | 6  | 0 | 2.456406  | 3.351023  | -0.108960 |
| 19 | 1  | 0 | 4.298929  | 2.463316  | -0.938671 |
| 20 | 7  | 0 | 1.236698  | -1.454984 | -0.094828 |
| 21 | 7  | 0 | -1.538844 | -1.282752 | -0.766305 |
| 22 | 6  | 0 | 3.198349  | -2.628615 | 0.190409  |
| 23 | 7  | 0 | -1.457272 | 1.515507  | -0.333310 |
| 24 | 6  | 0 | -0.014674 | 3.392556  | 0.384892  |
| 25 | 1  | 0 | 2.642349  | 4.415602  | -0.050495 |
| 26 | 6  | 0 | -1.428952 | -2.672943 | -0.716191 |
| 27 | 6  | 0 | 0.947991  | -2.811862 | -0.017591 |
| 28 | 6  | 0 | 2.163624  | -3.545643 | 0.197537  |
| 29 | 6  | 0 | -2.831646 | -1.006246 | -1.184991 |
| 30 | 1  | 0 | 4.260171  | -2.800978 | 0.275668  |
| 31 | 6  | 0 | -2.790940 | 1.422964  | -0.729284 |
| 32 | 6  | 0 | -1.260384 | 2.824198  | 0.086611  |
| 33 | 1  | 0 | 0.017658  | 4.463722  | 0.561533  |
| 34 | 6  | 0 | -0.305883 | -3.371549 | -0.298727 |
| 35 | 6  | 0 | -2.673577 | -3.269227 | -1.148789 |
| 36 | 6  | 0 | -3.531926 | -2.244531 | -1.453166 |
| 37 | 1  | 0 | 2.227689  | -4.621935 | 0.288787  |
| 38 | 6  | 0 | -3.413161 | 0.262028  | -1.181064 |
| 39 | 6  | 0 | -3.438643 | 2.698068  | -0.537975 |
| 40 | 6  | 0 | -2.499883 | 3.556501  | -0.017554 |
| 41 | 1  | 0 | -0.378046 | -4.455638 | -0.268932 |
| 42 | 1  | 0 | -2.854053 | -4.333939 | -1.215409 |
| 43 | 1  | 0 | -4.552251 | -2.309759 | -1.807108 |
| 44 | 1  | 0 | -4.451821 | 0.338205  | -1.490140 |
| 45 | 1  | 0 | -4.474613 | 2.903466  | -0.773276 |
| 46 | 1  | 0 | -2.620768 | 4.599875  | 0.241685  |
| 47 | 8  | 0 | 4.606876  | -0.099308 | -0.251805 |
| 48 | 6  | 0 | 3.336389  | -0.129710 | -0.238769 |

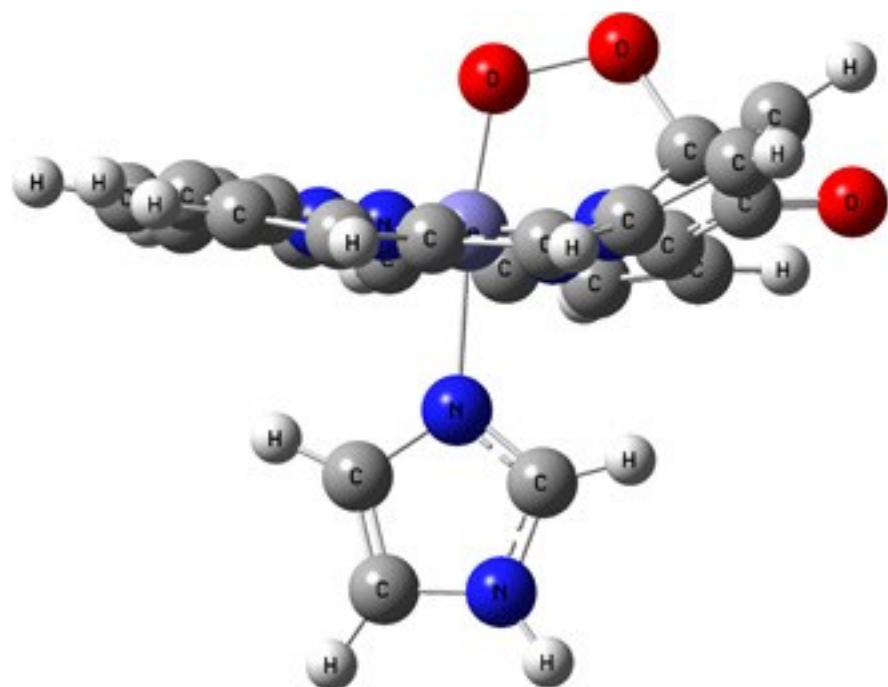

## <sup>2</sup>TS2

|    |    |   |           |           |           |
|----|----|---|-----------|-----------|-----------|
| 1  | 8  | 0 | 2.136131  | 0.772023  | -2.128026 |
| 2  | 8  | 0 | 0.307790  | 0.160912  | -1.994358 |
| 3  | 7  | 0 | -0.502279 | -0.213375 | 1.691708  |
| 4  | 6  | 0 | -1.689386 | -0.316686 | 2.261364  |
| 5  | 6  | 0 | 0.429268  | -0.278501 | 2.707087  |
| 6  | 6  | 0 | -0.210661 | -0.423332 | 3.906877  |
| 7  | 7  | 0 | -1.559614 | -0.445252 | 3.604401  |
| 8  | 1  | 0 | -2.636914 | -0.299922 | 1.745462  |
| 9  | 1  | 0 | 1.485913  | -0.221309 | 2.498984  |
| 10 | 1  | 0 | 0.154953  | -0.511674 | 4.917855  |
| 11 | 1  | 0 | -2.318786 | -0.542892 | 4.262774  |
| 12 | 6  | 0 | 2.536792  | 0.978525  | -0.808154 |
| 13 | 7  | 0 | 1.318483  | 1.264055  | -0.017420 |
| 14 | 6  | 0 | 3.336192  | 2.259889  | -0.706011 |
| 15 | 6  | 0 | 2.506739  | -1.460064 | -0.065200 |
| 16 | 26 | 0 | -0.101898 | 0.042780  | -0.411741 |
| 17 | 6  | 0 | 1.291479  | 2.568609  | 0.239750  |
| 18 | 6  | 0 | 2.595472  | 3.176098  | -0.066939 |
| 19 | 1  | 0 | 4.329203  | 2.360800  | -1.120904 |
| 20 | 7  | 0 | 1.157401  | -1.504826 | -0.176230 |
| 21 | 7  | 0 | -1.631897 | -1.208975 | -0.740160 |
| 22 | 6  | 0 | 3.046046  | -2.750874 | 0.182651  |
| 23 | 7  | 0 | -1.381696 | 1.556413  | -0.316118 |
| 24 | 6  | 0 | 0.124786  | 3.295419  | 0.541612  |
| 25 | 1  | 0 | 2.840087  | 4.213721  | 0.129687  |
| 26 | 6  | 0 | -1.579900 | -2.594837 | -0.707421 |
| 27 | 6  | 0 | 0.808795  | -2.837098 | -0.065238 |
| 28 | 6  | 0 | 1.977549  | -3.620087 | 0.180631  |
| 29 | 6  | 0 | -2.887326 | -0.880476 | -1.135118 |
| 30 | 1  | 0 | 4.099057  | -2.963002 | 0.301112  |
| 31 | 6  | 0 | -2.705464 | 1.544030  | -0.716812 |
| 32 | 6  | 0 | -1.118909 | 2.813188  | 0.159814  |
| 33 | 1  | 0 | 0.212425  | 4.334020  | 0.839877  |
| 34 | 6  | 0 | -0.470905 | -3.332428 | -0.332289 |
| 35 | 6  | 0 | -2.849546 | -3.132591 | -1.107857 |
| 36 | 6  | 0 | -3.660685 | -2.068259 | -1.388956 |
| 37 | 1  | 0 | 1.990554  | -4.696732 | 0.296641  |
| 38 | 6  | 0 | -3.396864 | 0.441932  | -1.153452 |
| 39 | 6  | 0 | -3.287464 | 2.859104  | -0.490298 |
| 40 | 6  | 0 | -2.330050 | 3.624983  | 0.081356  |
| 41 | 1  | 0 | -0.590080 | -4.412564 | -0.299054 |
| 42 | 1  | 0 | -3.082502 | -4.188194 | -1.171247 |
| 43 | 1  | 0 | -4.690466 | -2.077754 | -1.722772 |
| 44 | 1  | 0 | -4.431821 | 0.573997  | -1.452650 |
| 45 | 1  | 0 | -4.309717 | 3.125502  | -0.728723 |
| 46 | 1  | 0 | -2.393872 | 4.658070  | 0.399017  |
| 47 | 8  | 0 | 4.509773  | -0.223602 | -0.122494 |
| 48 | 6  | 0 | 3.293868  | -0.245759 | -0.276573 |

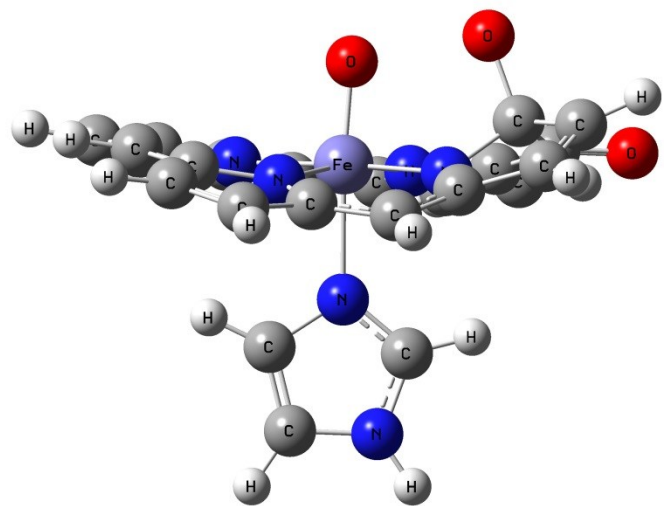



### <sup>3</sup>TS2

|    |    |   |           |           |           |
|----|----|---|-----------|-----------|-----------|
| 1  | 8  | 0 | 2.171929  | 0.678414  | -2.183997 |
| 2  | 8  | 0 | 0.320306  | 0.150904  | -2.038835 |
| 3  | 7  | 0 | -0.505080 | -0.185485 | 1.655267  |
| 4  | 6  | 0 | -1.699855 | -0.350064 | 2.213402  |
| 5  | 6  | 0 | 0.437115  | -0.175605 | 2.681079  |
| 6  | 6  | 0 | -0.206160 | -0.337867 | 3.882915  |
| 7  | 7  | 0 | -1.564375 | -0.446881 | 3.574185  |
| 8  | 1  | 0 | -2.633461 | -0.396379 | 1.682188  |
| 9  | 1  | 0 | 1.482203  | -0.056024 | 2.459826  |
| 10 | 1  | 0 | 0.160846  | -0.386677 | 4.893304  |
| 11 | 1  | 0 | -2.314846 | -0.575867 | 4.231609  |
| 12 | 6  | 0 | 2.583785  | 0.892411  | -0.809950 |
| 13 | 7  | 0 | 1.363658  | 1.223007  | -0.031822 |
| 14 | 6  | 0 | 3.413615  | 2.156383  | -0.725234 |
| 15 | 6  | 0 | 2.489357  | -1.499326 | -0.018547 |
| 16 | 26 | 0 | -0.101649 | 0.043055  | -0.425678 |
| 17 | 6  | 0 | 1.365472  | 2.561856  | 0.213523  |
| 18 | 6  | 0 | 2.693540  | 3.111267  | -0.104351 |
| 19 | 1  | 0 | 4.413137  | 2.217258  | -1.126337 |
| 20 | 7  | 0 | 1.112041  | -1.536232 | -0.167072 |
| 21 | 7  | 0 | -1.672499 | -1.182288 | -0.736886 |
| 22 | 6  | 0 | 2.982442  | -2.806351 | 0.246608  |
| 23 | 7  | 0 | -1.357303 | 1.601450  | -0.312198 |
| 24 | 6  | 0 | 0.235710  | 3.320661  | 0.493386  |
| 25 | 1  | 0 | 2.974033  | 4.142325  | 0.072614  |
| 26 | 6  | 0 | -1.651557 | -2.575465 | -0.702843 |
| 27 | 6  | 0 | 0.734432  | -2.864911 | -0.060134 |
| 28 | 6  | 0 | 1.891763  | -3.661782 | 0.221459  |
| 29 | 6  | 0 | -2.952590 | -0.805885 | -1.123292 |
| 30 | 1  | 0 | 4.025666  | -3.044366 | 0.389105  |
| 31 | 6  | 0 | -2.708862 | 1.614351  | -0.678169 |
| 32 | 6  | 0 | -1.053634 | 2.866619  | 0.163923  |
| 33 | 1  | 0 | 0.356356  | 4.367053  | 0.753093  |
| 34 | 6  | 0 | -0.562369 | -3.347862 | -0.318153 |
| 35 | 6  | 0 | -2.947058 | -3.075953 | -1.099136 |
| 36 | 6  | 0 | -3.742500 | -1.988417 | -1.370681 |
| 37 | 1  | 0 | 1.886757  | -4.736549 | 0.346307  |
| 38 | 6  | 0 | -3.429431 | 0.507377  | -1.111956 |
| 39 | 6  | 0 | -3.250385 | 2.924249  | -0.422662 |
| 40 | 6  | 0 | -2.241139 | 3.687966  | 0.117767  |
| 41 | 1  | 0 | -0.703473 | -4.424424 | -0.278147 |
| 42 | 1  | 0 | -3.207303 | -4.124116 | -1.162869 |
| 43 | 1  | 0 | -4.775415 | -1.982156 | -1.692747 |
| 44 | 1  | 0 | -4.468043 | 0.664106  | -1.389323 |
| 45 | 1  | 0 | -4.274204 | 3.214847  | -0.618059 |
| 46 | 1  | 0 | -2.282134 | 4.723101  | 0.428771  |
| 47 | 8  | 0 | 4.547410  | -0.324121 | -0.077632 |
| 48 | 6  | 0 | 3.293393  | -0.333344 | -0.253673 |

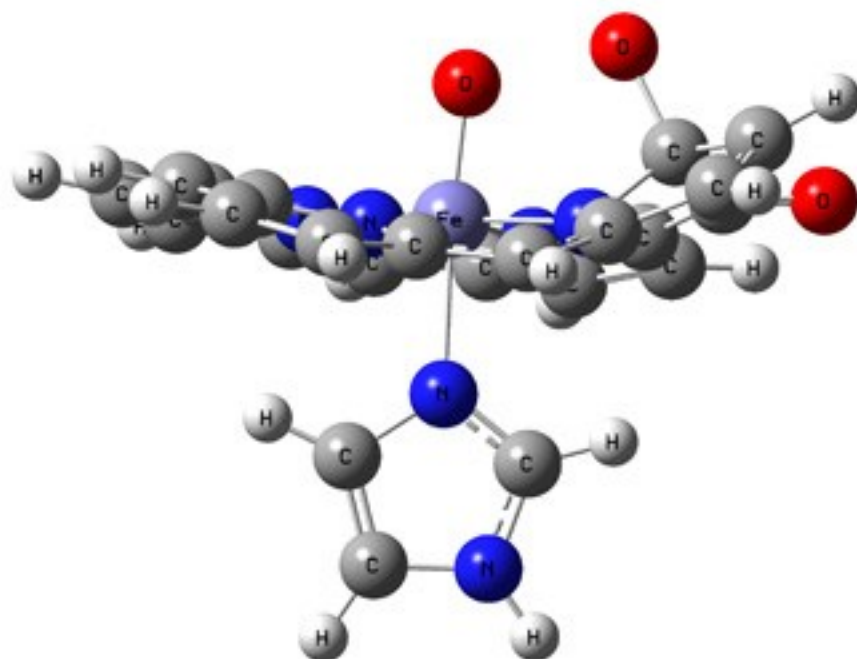

## <sup>4</sup>TS2

|    |             |             |             |
|----|-------------|-------------|-------------|
| O  | -2.73343600 | 0.06987800  | -2.24985900 |
| O  | 0.31979300  | 0.11274600  | -2.19259700 |
| N  | 0.18155400  | -0.10064400 | 1.65913200  |
| C  | 1.22479600  | 0.16567400  | 2.42331500  |
| C  | -0.84922100 | -0.43058500 | 2.51534500  |
| C  | -0.41688100 | -0.36054300 | 3.81157000  |
| N  | 0.90848100  | 0.02037000  | 3.73504800  |
| H  | 2.20132800  | 0.45697600  | 2.06944300  |
| H  | -1.82707000 | -0.69665000 | 2.14639700  |
| H  | -0.91290000 | -0.53977000 | 4.75266400  |
| H  | 1.53296900  | 0.17380400  | 4.51329000  |
| C  | -2.64032500 | -0.71999400 | -1.27946700 |
| N  | -1.36557400 | -1.12828800 | -0.67479600 |
| C  | -3.56847700 | -1.88638400 | -1.07907800 |
| C  | -2.27222800 | 1.66888700  | 0.09692500  |
| Fe | 0.23021500  | 0.00017400  | -0.58109000 |
| C  | -1.48830800 | -2.40817200 | -0.32299600 |
| C  | -2.86837900 | -2.88393700 | -0.52682100 |
| H  | -4.60132000 | -1.86074800 | -1.39844800 |
| N  | -0.95341000 | 1.62416100  | -0.25332700 |
| N  | 1.88621400  | 1.13411100  | -0.45537400 |
| C  | -2.68185600 | 2.98707200  | 0.43453100  |
| N  | 1.35302100  | -1.62480800 | -0.37753900 |
| C  | -0.42774900 | -3.24701400 | 0.06146400  |
| H  | -3.19690400 | -3.88707400 | -0.28107200 |
| C  | 1.91437300  | 2.52200400  | -0.52514700 |
| C  | -0.51451200 | 2.91929700  | -0.15468100 |
| C  | -1.57424600 | 3.78349000  | 0.24645300  |
| C  | 3.15980100  | 0.71694000  | -0.65438400 |
| H  | -3.68333700 | 3.26793400  | 0.72990000  |
| C  | 2.72395900  | -1.70164700 | -0.46248100 |
| C  | 0.90165500  | -2.87904900 | -0.07304700 |
| H  | -0.65566400 | -4.27801600 | 0.31026600  |
| C  | 0.81862900  | 3.33333200  | -0.36385200 |
| C  | 3.26827600  | 2.96770900  | -0.75005000 |
| C  | 4.04225800  | 1.85078100  | -0.83060200 |
| H  | -1.49147500 | 4.85488100  | 0.37897100  |
| C  | 3.57363700  | -0.63280900 | -0.63690900 |
| C  | 3.14823800  | -3.07660000 | -0.23338000 |
| C  | 2.03271500  | -3.79391400 | 0.03509900  |
| H  | 0.99210900  | 4.40626900  | -0.37488200 |
| H  | 3.57139000  | 4.00363800  | -0.83594700 |
| H  | 5.10989700  | 1.78217300  | -0.99649700 |
| H  | 4.63635800  | -0.83307300 | -0.72837700 |
| H  | 4.17678200  | -3.41404800 | -0.26133200 |
| H  | 1.94772700  | -4.84809300 | 0.26679300  |
| O  | -4.30117200 | 0.45705100  | 0.51096400  |
| C  | -3.19597900 | 0.57472200  | 0.07437300  |

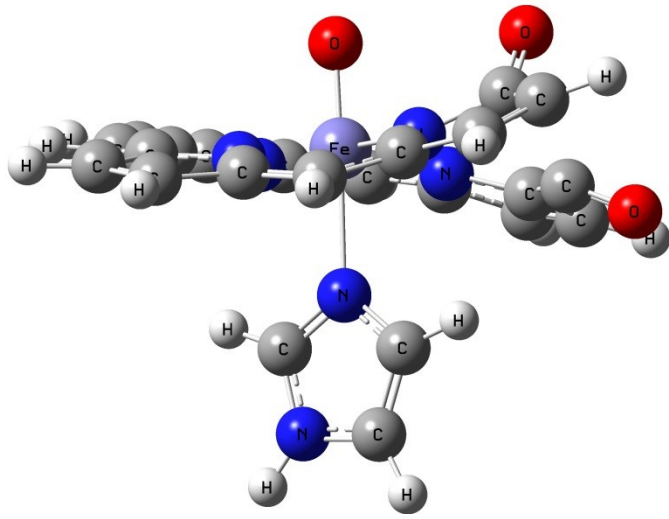

## <sup>2</sup>TS3

|    |    |   |           |           |           |
|----|----|---|-----------|-----------|-----------|
| 1  | 8  | 0 | 3.187730  | 0.917388  | -0.625053 |
| 2  | 8  | 0 | -0.180981 | -0.016937 | -2.142929 |
| 3  | 7  | 0 | -0.279121 | 0.030492  | 1.630680  |
| 4  | 6  | 0 | -0.246340 | -1.036479 | 2.428198  |
| 5  | 6  | 0 | -0.323730 | 1.156232  | 2.451955  |
| 6  | 6  | 0 | -0.316361 | 0.756262  | 3.764558  |
| 7  | 7  | 0 | -0.268590 | -0.636081 | 3.735509  |
| 8  | 1  | 0 | -0.203136 | -2.059482 | 2.101885  |
| 9  | 1  | 0 | -0.343339 | 2.147575  | 2.037958  |
| 10 | 1  | 0 | -0.330841 | 1.314255  | 4.684190  |
| 11 | 1  | 0 | -0.238587 | -1.243620 | 4.538014  |
| 12 | 6  | 0 | 2.239731  | 1.790719  | -0.852854 |
| 13 | 7  | 0 | 0.913918  | 1.694293  | -0.547753 |
| 14 | 6  | 0 | 2.553727  | 3.108848  | -1.417186 |
| 15 | 6  | 0 | 2.664036  | -0.699798 | 0.141439  |
| 16 | 26 | 0 | -0.210259 | -0.010691 | -0.496947 |
| 17 | 6  | 0 | 0.351192  | 2.946354  | -0.884587 |
| 18 | 6  | 0 | 1.401683  | 3.826625  | -1.386149 |
| 19 | 1  | 0 | 3.542248  | 3.401620  | -1.732928 |
| 20 | 7  | 0 | 1.431497  | -1.120881 | -0.285983 |
| 21 | 7  | 0 | -1.240942 | -1.712069 | -0.504792 |
| 22 | 6  | 0 | 3.695985  | -1.640871 | -0.361148 |
| 23 | 7  | 0 | -1.894283 | 1.045015  | -0.337747 |
| 24 | 6  | 0 | -0.968977 | 3.282235  | -0.784485 |
| 25 | 1  | 0 | 1.243948  | 4.852060  | -1.688766 |
| 26 | 6  | 0 | -0.769014 | -2.912592 | -0.964396 |
| 27 | 6  | 0 | 1.616961  | -2.323377 | -0.987204 |
| 28 | 6  | 0 | 3.048311  | -2.609404 | -1.054930 |
| 29 | 6  | 0 | -2.605363 | -1.871351 | -0.263364 |
| 30 | 1  | 0 | 4.749354  | -1.532522 | -0.157158 |
| 31 | 6  | 0 | -3.157221 | 0.535346  | -0.043995 |
| 32 | 6  | 0 | -2.028919 | 2.402187  | -0.449088 |
| 33 | 1  | 0 | -1.241162 | 4.309299  | -1.007217 |
| 34 | 6  | 0 | 0.586953  | -3.164970 | -1.307698 |
| 35 | 6  | 0 | -1.840794 | -3.878018 | -0.984023 |
| 36 | 6  | 0 | -2.970922 | -3.240536 | -0.525903 |
| 37 | 1  | 0 | 3.477886  | -3.472846 | -1.542890 |
| 38 | 6  | 0 | -3.473392 | -0.821926 | 0.008329  |
| 39 | 6  | 0 | -4.093278 | 1.623753  | 0.054301  |
| 40 | 6  | 0 | -3.396545 | 2.781308  | -0.210456 |
| 41 | 1  | 0 | 0.818203  | -4.121639 | -1.763014 |
| 42 | 1  | 0 | -1.740664 | -4.906395 | -1.299343 |
| 43 | 1  | 0 | -3.965211 | -3.649088 | -0.415793 |
| 44 | 1  | 0 | -4.513948 | -1.075050 | 0.190194  |
| 45 | 1  | 0 | -5.146804 | 1.516798  | 0.269239  |
| 46 | 1  | 0 | -3.774683 | 3.792723  | -0.242791 |
| 47 | 8  | 0 | 3.730356  | -0.140005 | 2.261921  |
| 48 | 6  | 0 | 2.798827  | -0.041328 | 1.490042  |

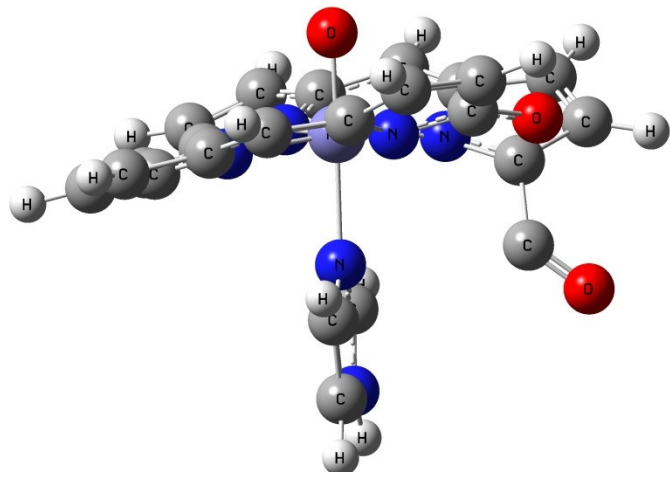

### <sup>3</sup>TS3

|    |    |   |           |           |           |
|----|----|---|-----------|-----------|-----------|
| 1  | 8  | 0 | -3.161691 | -0.507372 | -1.026601 |
| 2  | 8  | 0 | 0.225341  | 0.148011  | -2.214925 |
| 3  | 7  | 0 | 0.245311  | -0.133047 | 1.586429  |
| 4  | 6  | 0 | 0.338185  | 0.906933  | 2.407646  |
| 5  | 6  | 0 | 0.166526  | -1.277800 | 2.376412  |
| 6  | 6  | 0 | 0.211894  | -0.917002 | 3.700201  |
| 7  | 7  | 0 | 0.322354  | 0.475007  | 3.709126  |
| 8  | 1  | 0 | 0.414272  | 1.933262  | 2.098028  |
| 9  | 1  | 0 | 0.075824  | -2.250655 | 1.928400  |
| 10 | 1  | 0 | 0.166824  | -1.497103 | 4.605452  |
| 11 | 1  | 0 | 0.365764  | 1.062086  | 4.524757  |
| 12 | 6  | 0 | -2.355835 | -1.566978 | -0.995077 |
| 13 | 7  | 0 | -1.023438 | -1.573741 | -0.690642 |
| 14 | 6  | 0 | -2.825731 | -2.904964 | -1.273481 |
| 15 | 6  | 0 | -2.639615 | 0.838056  | 0.047841  |
| 16 | 26 | 0 | 0.223832  | 0.029321  | -0.575102 |
| 17 | 6  | 0 | -0.604024 | -2.916543 | -0.811875 |
| 18 | 6  | 0 | -1.738017 | -3.737480 | -1.155831 |
| 19 | 1  | 0 | -3.848875 | -3.145240 | -1.518728 |
| 20 | 7  | 0 | -1.347119 | 1.239720  | -0.265175 |
| 21 | 7  | 0 | 1.394029  | 1.656529  | -0.421840 |
| 22 | 6  | 0 | -3.563750 | 1.942740  | -0.281935 |
| 23 | 7  | 0 | 1.825753  | -1.173599 | -0.407483 |
| 24 | 6  | 0 | 0.698064  | -3.357929 | -0.679821 |
| 25 | 1  | 0 | -1.696914 | -4.808468 | -1.304551 |
| 26 | 6  | 0 | 1.003428  | 2.946901  | -0.742400 |
| 27 | 6  | 0 | -1.424233 | 2.542014  | -0.772216 |
| 28 | 6  | 0 | -2.815755 | 2.957114  | -0.796603 |
| 29 | 6  | 0 | 2.774553  | 1.680700  | -0.245780 |
| 30 | 1  | 0 | -4.627277 | 1.900744  | -0.103883 |
| 31 | 6  | 0 | 3.132246  | -0.776216 | -0.157164 |
| 32 | 6  | 0 | 1.829953  | -2.559042 | -0.465388 |
| 33 | 1  | 0 | 0.866149  | -4.428284 | -0.770585 |
| 34 | 6  | 0 | -0.325867 | 3.343704  | -0.992343 |
| 35 | 6  | 0 | 2.152385  | 3.809262  | -0.725539 |
| 36 | 6  | 0 | 3.245468  | 3.031957  | -0.397857 |
| 37 | 1  | 0 | -3.158428 | 3.929084  | -1.127106 |
| 38 | 6  | 0 | 3.570426  | 0.549547  | -0.065986 |
| 39 | 6  | 0 | 3.971473  | -1.941725 | -0.053861 |
| 40 | 6  | 0 | 3.166463  | -3.042520 | -0.251967 |
| 41 | 1  | 0 | -0.492571 | 4.369357  | -1.307681 |
| 42 | 1  | 0 | 2.129421  | 4.871654  | -0.929382 |
| 43 | 1  | 0 | 4.278331  | 3.340670  | -0.305586 |
| 44 | 1  | 0 | 4.634518  | 0.708165  | 0.086857  |
| 45 | 1  | 0 | 5.037199  | -1.919252 | 0.130573  |
| 46 | 1  | 0 | 3.452170  | -4.086144 | -0.249775 |
| 47 | 8  | 0 | -3.799191 | 0.147911  | 2.093575  |
| 48 | 6  | 0 | -2.876561 | 0.034818  | 1.300787  |





# <sup>4</sup>TS3

|    |             |             |             |
|----|-------------|-------------|-------------|
| O  | -3.28263800 | -0.13888400 | -0.74709800 |
| O  | 0.10559700  | 0.11336300  | -2.15372100 |
| N  | 0.27154900  | -0.12822800 | 1.64974100  |
| C  | 0.46723100  | 0.88830700  | 2.47061500  |
| C  | 0.18749800  | -1.25752400 | 2.43711800  |
| C  | 0.33439900  | -0.91257300 | 3.75232900  |
| N  | 0.51502600  | 0.45835500  | 3.75538800  |
| H  | 0.57880300  | 1.91889300  | 2.17153300  |
| H  | 0.02107500  | -2.22987800 | 2.00095600  |
| H  | 0.32333300  | -1.49380300 | 4.66101400  |
| H  | 0.64868800  | 1.04195800  | 4.56821600  |
| C  | -2.58454400 | -1.19558000 | -0.90530400 |
| N  | -1.28230300 | -1.39521600 | -0.57422600 |
| C  | -3.18586000 | -2.42750600 | -1.43498400 |
| C  | -2.45177900 | 1.20991700  | 0.24493700  |
| Fe | 0.17419300  | 0.02439800  | -0.53807300 |
| C  | -1.01493800 | -2.73002800 | -0.88738300 |
| C  | -2.22740600 | -3.37597300 | -1.36942600 |
| H  | -4.21718500 | -2.50097400 | -1.75090500 |
| N  | -1.17525900 | 1.43049300  | -0.17979700 |
| N  | 1.53368800  | 1.47765500  | -0.49226100 |
| C  | -3.28403000 | 2.39630700  | -0.08992000 |
| N  | 1.60095900  | -1.36433100 | -0.44813100 |
| C  | 0.20212000  | -3.34385400 | -0.82523600 |
| H  | -2.29315700 | -4.42213300 | -1.64266700 |
| C  | 1.31126900  | 2.76708300  | -0.85399600 |
| C  | -1.13884000 | 2.68679000  | -0.76676900 |
| C  | -2.47596600 | 3.26272900  | -0.73598900 |
| C  | 2.89899100  | 1.33748000  | -0.32568400 |
| H  | -4.33543000 | 2.48451000  | 0.14729400  |
| C  | 2.94346000  | -1.14104400 | -0.21227700 |
| C  | 1.44335000  | -2.70721100 | -0.55200200 |
| H  | 0.23659800  | -4.40750400 | -1.04361500 |
| C  | 0.02342900  | 3.32312900  | -1.10137800 |
| C  | 2.55246300  | 3.48975300  | -0.88761500 |
| C  | 3.53813400  | 2.60485400  | -0.53329600 |
| H  | -2.73862800 | 4.23214900  | -1.14143700 |
| C  | 3.53853300  | 0.11840500  | -0.14303400 |
| C  | 3.63501000  | -2.39365600 | -0.15302300 |
| C  | 2.69997700  | -3.37305800 | -0.37632400 |
| H  | -0.02434800 | 4.33939100  | -1.47883900 |
| H  | 2.65315800  | 4.53835100  | -1.13782600 |
| H  | 4.60341800  | 2.78424200  | -0.45809900 |
| H  | 4.61693900  | 0.14239000  | -0.00812200 |
| H  | 4.69889000  | -2.50861300 | 0.01297400  |
| H  | 2.84809400  | -4.44472700 | -0.41825800 |
| O  | -3.18053800 | -0.30648300 | 2.08214500  |
| C  | -2.66821100 | 0.63930800  | 1.59565200  |

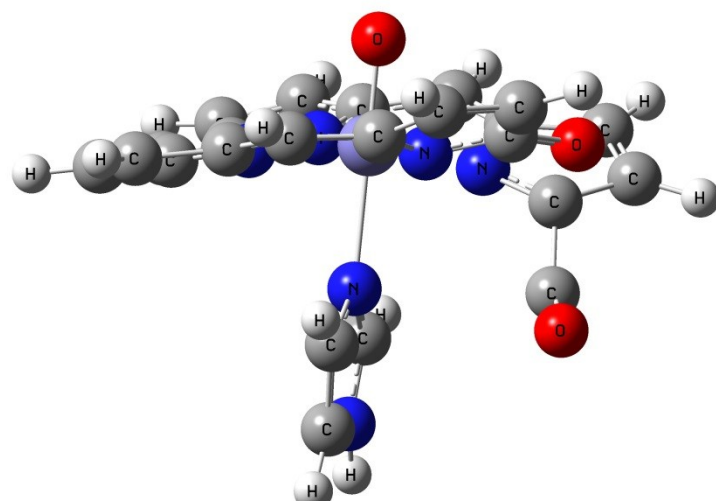

**21b**

|    |             |             |             |
|----|-------------|-------------|-------------|
| Fe | 0.13907400  | 0.00614700  | -0.35375300 |
| N  | -1.34050600 | -1.36095300 | -0.25652100 |
| N  | 1.51772200  | -1.45456100 | -0.28015300 |
| N  | -1.24541700 | 1.48799800  | -0.36707200 |
| N  | 1.61361800  | 1.39006200  | -0.39807700 |
| C  | -2.68065700 | -1.15668900 | -0.30423100 |
| C  | 2.88102600  | -1.31609800 | -0.35933200 |
| C  | -1.18499800 | -2.73806800 | -0.18431100 |
| C  | 1.28793500  | -2.80567500 | -0.20545000 |
| C  | -2.59480100 | 1.37201800  | -0.39075800 |
| C  | 2.96509400  | 1.15576400  | -0.46832300 |
| C  | -0.99788000 | 2.85412700  | -0.38720100 |
| C  | 1.47479700  | 2.75531500  | -0.42564200 |
| C  | -3.40387800 | -2.38764200 | -0.25417500 |
| C  | 3.52261600  | -2.60501500 | -0.32219500 |
| C  | -2.46537600 | -3.38059800 | -0.17612200 |
| C  | 2.52905300  | -3.53249900 | -0.22236700 |
| C  | -3.23580400 | 2.64941900  | -0.41903400 |
| C  | 3.69059400  | 2.39792700  | -0.53267600 |
| C  | -2.23394700 | 3.58023500  | -0.41427500 |
| C  | 2.76072100  | 3.39467400  | -0.50218800 |
| H  | -4.48131800 | -2.45735200 | -0.28263000 |
| H  | 4.59235800  | -2.76374900 | -0.37212800 |
| H  | -2.61899400 | -4.45141400 | -0.12896600 |
| H  | 2.61414400  | -4.61070500 | -0.17485300 |
| H  | -4.30660000 | 2.78811300  | -0.44356500 |
| H  | 4.76819100  | 2.48130500  | -0.59529400 |
| H  | -2.31563300 | 4.65973500  | -0.43677400 |
| H  | 2.91753100  | 4.46531400  | -0.53702800 |
| C  | 3.55980900  | -0.10374200 | -0.45253800 |
| C  | 0.25896800  | 3.43401400  | -0.40611900 |
| C  | 0.03140400  | -3.39947900 | -0.14649300 |
| H  | 4.64320400  | -0.14366700 | -0.51443900 |
| H  | 0.30082700  | 4.51937700  | -0.43005700 |
| H  | 0.00114300  | -4.48414500 | -0.09287100 |
| H  | 2.21970400  | 0.47087500  | 2.17176400  |
| C  | 1.23371600  | 0.31148000  | 2.57788600  |
| C  | 0.83147200  | 0.29103900  | 3.88479300  |
| C  | -0.89742700 | -0.07324600 | 2.55006500  |
| N  | -0.52733700 | 0.04645500  | 3.84813800  |
| H  | 1.36934600  | 0.42351700  | 4.81033700  |
| H  | -1.90854200 | -0.27084200 | 2.23057200  |
| H  | -1.14487100 | -0.02972800 | 4.64335000  |
| N  | 0.14765600  | 0.08349400  | 1.75594800  |
| C  | -3.35948200 | 0.13114700  | -0.37198700 |
| O  | -4.60282600 | 0.17310500  | -0.38668600 |
| O  | 0.12303200  | 0.03622800  | -2.19470500 |
| O  | 0.07175500  | -1.09362900 | -2.81481500 |

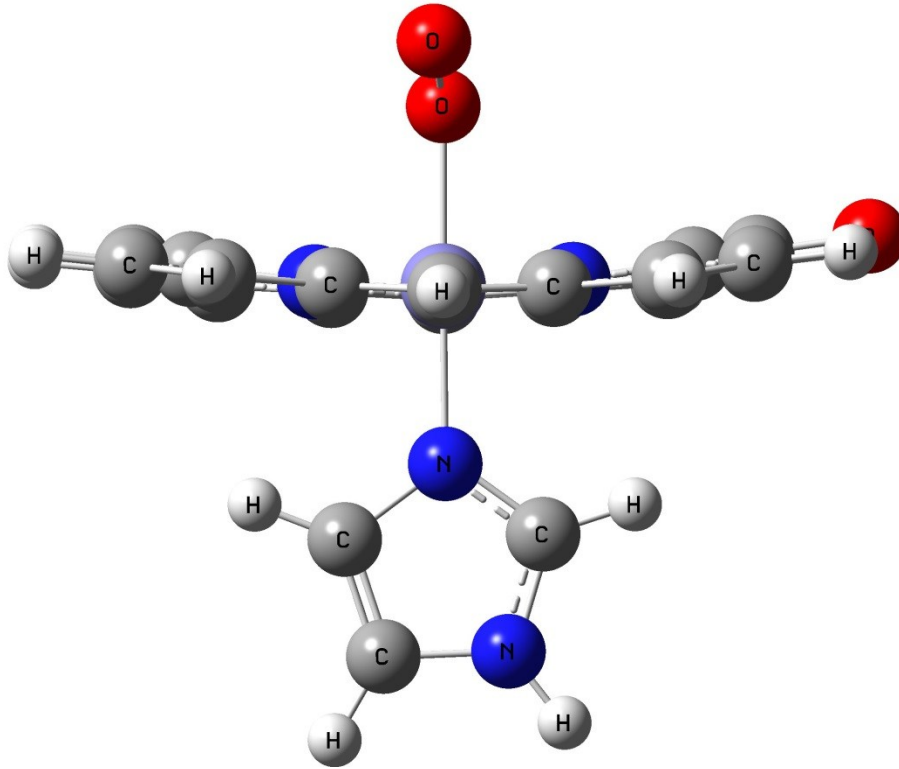

**21c**

|    |             |             |             |
|----|-------------|-------------|-------------|
| Fe | -0.15823400 | 0.00436800  | -0.39935200 |
| N  | 1.26423800  | 1.46555400  | -0.41628400 |
| N  | -1.60391900 | 1.42458100  | -0.35560000 |
| N  | 1.29276200  | -1.39210000 | -0.30582200 |
| N  | -1.56468100 | -1.41957500 | -0.27147600 |
| C  | 2.62282500  | 1.31352300  | -0.35635800 |
| C  | -2.95462500 | 1.22102000  | -0.26553100 |
| C  | 1.04808300  | 2.82330300  | -0.52720900 |
| C  | -1.42834000 | 2.79486000  | -0.46526300 |
| C  | 2.64998500  | -1.19764900 | -0.25819400 |
| C  | -2.92140800 | -1.24230600 | -0.20115800 |
| C  | 1.11525900  | -2.76079900 | -0.32295700 |
| C  | -1.35839600 | -2.79131900 | -0.29543200 |
| C  | 3.27919500  | 2.57192700  | -0.43190400 |
| C  | -3.65371000 | 2.48651300  | -0.30337300 |
| C  | 2.29238700  | 3.52300800  | -0.54447400 |
| C  | -2.70808900 | 3.45777300  | -0.43399300 |
| C  | 3.33732500  | -2.43853300 | -0.23930400 |
| C  | -3.59092500 | -2.52441500 | -0.17231800 |
| C  | 2.37585900  | -3.42375000 | -0.28208300 |
| C  | -2.62337200 | -3.47970100 | -0.23666000 |
| H  | 4.35305100  | 2.69042300  | -0.40421200 |
| H  | -4.73078600 | 2.59495300  | -0.24692400 |
| H  | 2.39653900  | 4.59925900  | -0.62738100 |
| H  | -2.84645900 | 4.53097900  | -0.50173300 |
| H  | 4.41404100  | -2.52560200 | -0.20616800 |
| H  | -4.66603800 | -2.65349100 | -0.12140500 |
| H  | 2.51051300  | -4.49976200 | -0.29140500 |
| H  | -2.73726000 | -4.55786800 | -0.24423200 |
| C  | -3.58339400 | -0.01833400 | -0.17721100 |
| C  | -0.12955000 | -3.41017200 | -0.32334400 |
| C  | -0.21210500 | 3.43749500  | -0.55984700 |
| H  | -4.66817900 | -0.03189000 | -0.12049200 |
| H  | -0.11649500 | -4.49759100 | -0.33284000 |
| H  | -0.22690900 | 4.52182500  | -0.64292300 |
| H  | -0.33213100 | 2.18966500  | 2.05663200  |
| C  | -0.18483500 | 1.21012300  | 2.48330800  |
| C  | -0.06340100 | 0.83920800  | 3.79407100  |
| C  | 0.09451500  | -0.93731700 | 2.47749400  |
| N  | 0.11226300  | -0.53444300 | 3.77366400  |
| H  | -0.07990900 | 1.40332400  | 4.71358300  |
| H  | 0.22075100  | -1.96007100 | 2.15710500  |
| H  | 0.25360000  | -1.13408100 | 4.57197100  |
| N  | -0.08532500 | 0.09576600  | 1.67745500  |
| C  | 3.36376900  | 0.06921000  | -0.23681800 |
| O  | 4.61089200  | 0.08597400  | -0.13564000 |
| O  | -0.16530200 | 0.02768800  | -2.13228000 |
| O  | -0.21308100 | -1.03918100 | -2.83441000 |

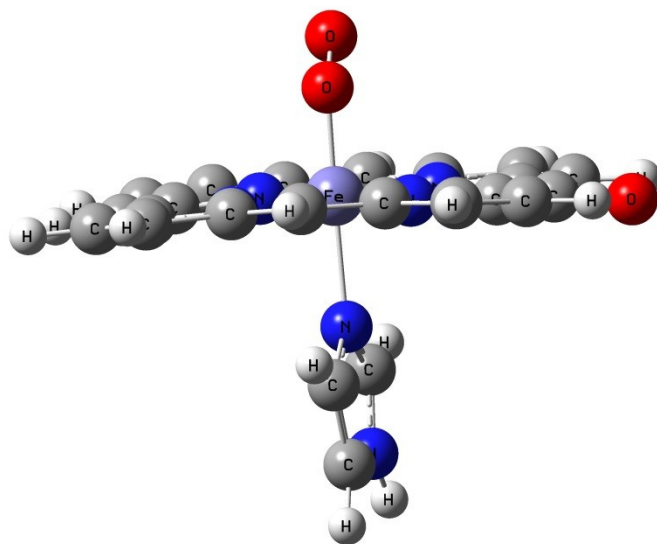

Supplement: c6dt04250c1.pdf [file c6dt04250c1.pdf]
